# Supplementary material for: Dietary patterns, genetic predisposition, and risk of cholelithiasis: a large-scale prospective cohort study
Source: PubMed Central journal article supplement (PMC11466834; doi:10.3389/fnut.2024.1469789), 2024-09-27
Supplement: Data_Sheet_1.pdf [file Data_Sheet_1.pdf]

## Supplementary Material

### Table of contents

|                                                                                                                             |    |
|-----------------------------------------------------------------------------------------------------------------------------|----|
| <i>Supplementary Table S1. Components and scoring criteria of the Mediterranean Diet (MED) score.</i>                       | 3  |
| <i>Supplementary Table S2. Components and scoring criteria of the alternative Mediterranean Diet (aMED) score.</i>          | 4  |
| <i>Supplementary Table S3. Components and scoring criteria of the overall Plant-based Diet Index (PDI).</i>                 | 5  |
| <i>Supplementary Table S4. Components and scoring criteria of the healthy Plant-based Diet Index (hPDI).</i>                | 7  |
| <i>Supplemental Table S5. Components and scoring criteria of the unhealthy Plant-based Diet Index (uPDI).</i>               | 9  |
| <i>Supplementary Table S6. Components and scoring criteria of the Healthy Eating Index 2015 (HEI-2015).</i>                 | 11 |
| <i>Supplementary Table S7. Components and scoring criteria of EAT-Lancet Score.</i>                                         | 13 |
| <i>Supplementary Table S8. Single-nucleotide polymorphisms used to construct the genetic risk score for cholelithiasis.</i> | 14 |
| <i>Supplementary Table S9. Baseline characteristics of participants, according to the quartiles of MED.</i>                 | 15 |
| <i>Supplementary Table S10. Baseline characteristics of participants, according to the quartiles of aMED.</i>               | 17 |
| <i>Supplementary Table S11. Baseline characteristics of participants, according to the quartiles of PDI.</i>                | 19 |
| <i>Supplementary Table S12. Baseline characteristics of participants, according to the quartiles of hPDI.</i>               | 21 |
| <i>Supplementary Table S13. Baseline characteristics of participants, according to the quartiles of uPDI.</i>               | 23 |
| <i>Supplementary Table S14. Baseline characteristics of participants, according to the quartiles of HEI-2015.</i>           | 25 |
| <i>Supplementary Table S15. Baseline characteristics of participants, according to the quartiles of EAT-lancet score.</i>   | 27 |
| <i>Supplementary Table S16. Subgroup analysis for the association between MED and risk of cholelithiasis incidence.</i>     | 29 |
| <i>Supplementary Table S17. Subgroup analysis for the association between aMED and risk of cholelithiasis incidence.</i>    | 30 |
| <i>Supplementary Table S18. Subgroup analysis for the association between PDI and risk of cholelithiasis incidence.</i>     | 31 |
| <i>Supplementary Table S19. Subgroup analysis for the association between hPDI and risk of cholelithiasis incidence.</i>    | 32 |

|                                                                                                                                                    |    |
|----------------------------------------------------------------------------------------------------------------------------------------------------|----|
| <i>Supplementary Table S20. Subgroup analysis for the association between uPDI and risk of cholelithiasis incidence.</i> .....                     | 33 |
| <i>Supplementary Table S21. Subgroup analysis for the association between HEI-2015 and risk of cholelithiasis incidence.</i> .....                 | 34 |
| <i>Supplementary Table S22. Subgroup analysis for the association between EAT-lancet score and risk of cholelithiasis incidence.</i> .....         | 35 |
| <i>Supplementary Table S23. Sensitivity analyses of the cholelithiasis risk according to MED and the level of genetic risk.</i> .....              | 36 |
| <i>Supplementary Table S24. Sensitivity analyses of the cholelithiasis risk according to aMED and the level of genetic risk.</i> .....             | 37 |
| <i>Supplementary Table S25. Sensitivity analyses of the cholelithiasis risk according to PDI and the level of genetic risk.</i> .....              | 38 |
| <i>Supplementary Table S26. Sensitivity analyses of the cholelithiasis risk according to hPDI and the level of genetic risk.</i> .....             | 39 |
| <i>Supplementary Table S27. Sensitivity analyses of the cholelithiasis risk according to uPDI and the level of genetic risk.</i> .....             | 40 |
| <i>Supplementary Table S28. Sensitivity analyses of the cholelithiasis risk according to HEI-2015 and the level of genetic risk.</i> .....         | 41 |
| <i>Supplementary Table S29. Sensitivity analyses of the cholelithiasis risk according to EAT-lancet score and the level of genetic risk.</i> ..... | 42 |
| <i>Supplementary Figure S1. Flow diagram of participants in the present study.</i> .....                                                           | 43 |
| <i>Supplementary Figure S2. Joint effects and interactions of dietary patterns and PRS on cholelithiasis risk.</i> .....                           | 44 |

**Supplementary Table S1. Components and scoring criteria of the Mediterranean Diet (MED) score.**

| Components                | Food                                                                                                                                                                                                                                                                                                                                            | Score of 1                                   | Score of 0                                   |
|---------------------------|-------------------------------------------------------------------------------------------------------------------------------------------------------------------------------------------------------------------------------------------------------------------------------------------------------------------------------------------------|----------------------------------------------|----------------------------------------------|
| 1.vegetables              | coleslaw, side salad, avocado, beetroot, broccoli, butternut squash, cabbage/kale, carrot, cauliflower, celery, courgette, cucumber, garlic, leek, lettuce, mushroom, onion, parsnip, sweet pepper, spinach, other vegetables                                                                                                                   | for each component, intakes above the median | for each component, intakes below the median |
| 2.legumes                 | baked bean, pulses, broad bean, tofu                                                                                                                                                                                                                                                                                                            |                                              |                                              |
| 3.fruits and nuts         | fruit juice, stewed fruit, prune, dried fruit, mixed fruit, apple, banana, berry, cherry, grapefruit, grape, mango, melon, orange, satsuma, other fruit, salted peanuts, unsalted peanuts, salted nuts, unsalted nuts, seeds                                                                                                                    |                                              |                                              |
| 4.cereals                 | porridge, muesli, oat crunch, sweetened cereal, plain cereal, bran cereal, whole-wheat cereal, other cereal, whole-meal pasta, brown rice, couscous, bread, garlic bread, crispbread, oatcakes, other bread, white pasta, white rice, other grain, pancake, scotch pancake, danish pastry, scone, cereal bar, savoury biscuits, cheesy biscuits |                                              |                                              |
| 5.fish                    | tinned tuna, oily fish, breaded fish, battered fish, white fish, prawns, lobster/crab, shellfish, other fish                                                                                                                                                                                                                                    |                                              |                                              |
| 6. MUFA: SFA ratio        | monounsaturated fatty acids, saturated fatty acids                                                                                                                                                                                                                                                                                              |                                              |                                              |
| 7.meat and meat product   | sausage, beef, pork, lamb, bacon, ham, liver                                                                                                                                                                                                                                                                                                    | for each component, intakes below the median | for each component, intakes above the median |
| 8.dairy and dairy product | fat hard cheese, hard cheese, soft cheese, blue cheese, low fat cheese spread, cheese spread, cottage cheese, feta, mozzarella, goats cheese, other cheese                                                                                                                                                                                      |                                              |                                              |
| 9.alcohol                 | alcohol                                                                                                                                                                                                                                                                                                                                         | 5 g/d ≤ alcohol ≤25 g/d                      | alcohol <5g/d or >25 g/d                     |
| total score               |                                                                                                                                                                                                                                                                                                                                                 | 9                                            | 0                                            |

Abbreviations: MUFA, monounsaturated fatty acid; SFA, saturated fatty acid.

**Supplementary Table S2. Components and scoring criteria of the alternative Mediterranean Diet (aMED) score.**

| Components               | Food                                                                                                                                                                                                                          | Score of 1                                              | Score of 0                                   |
|--------------------------|-------------------------------------------------------------------------------------------------------------------------------------------------------------------------------------------------------------------------------|---------------------------------------------------------|----------------------------------------------|
| 1.vegetables             | coleslaw, side salad, avocado, beetroot, broccoli, butternut squash, cabbage/kale, carrot, cauliflower, celery, courgette, cucumber, garlic, leek, lettuce, mushroom, onion, parsnip, sweet pepper, spinach, other vegetables | for each component, intakes above the median            | for each component, intakes below the median |
| 2.legumes                | baked bean, pulses, broad bean, tofu                                                                                                                                                                                          |                                                         |                                              |
| 3.fruits                 | fruit juice, stewed fruit, prune, dried fruit, mixed fruit, apple, banana, berry, cherry, grapefruit, grape, mango, melon, orange, satsuma, other fruit                                                                       |                                                         |                                              |
| 4.nuts                   | salted peanuts, unsalted peanuts, salted nuts, unsalted nuts, seeds                                                                                                                                                           |                                                         |                                              |
| 5.whole grains           | muesli, oat crunch, sweetened cereal, plain cereal, bran cereal, whole-wheat cereal, other cereal, oatcakes, whole-meal pasta, brown rice, couscous, cereal bar                                                               |                                                         |                                              |
| 6.fish                   | tinned tuna, oily fish, breaded fish, battered fish, white fish, prawns, lobster/crab, shellfish, other fish                                                                                                                  |                                                         |                                              |
| 7. MUFA: SFA ratio       | monounsaturated fatty acids, saturated fatty acids                                                                                                                                                                            |                                                         |                                              |
| 8.red and processed meat | sausage, beef, pork, lamb, bacon, ham, liver                                                                                                                                                                                  | for each component, intakes below the median            | for each component, intakes above the median |
| 9.alcohol                | alcohol                                                                                                                                                                                                                       | $5 \text{ g/d} \leq \text{alcohol} \leq 15 \text{ g/d}$ | alcohol $<5\text{g/d}$ or $>15 \text{ g/d}$  |
| total score              |                                                                                                                                                                                                                               | 9                                                       | 0                                            |

Abbreviations: MUFA, monounsaturated fatty acid; SFA, saturated fatty acid.

**Supplementary Table S3. Components and scoring criteria of the overall Plant-based Diet Index (PDI).**

| Components                    | Food                                                                                                                                                                                                                                                                                                                                                                                                                        | Criteria for maximum score <sup>a</sup>                        | Criteria for minimum score                                    |
|-------------------------------|-----------------------------------------------------------------------------------------------------------------------------------------------------------------------------------------------------------------------------------------------------------------------------------------------------------------------------------------------------------------------------------------------------------------------------|----------------------------------------------------------------|---------------------------------------------------------------|
| 1. whole grains               | porridge, muesli, oat crunch, sweetened cereal, plain cereal, bran cereal, whole-wheat cereal, other cereal, whole-meal pasta, brown rice, couscous                                                                                                                                                                                                                                                                         | for each component, intakes above the highest quintile score 5 | for each component, intakes below the lowest quintile score 1 |
| 2. fruits                     | avocado, stewed fruit, mixed fruit, apple, banana, berry, cherry, grapefruit, grape, mango, melon, orange, satsuma, peach/nectarine, pear, pineapple, plum, other fruits                                                                                                                                                                                                                                                    |                                                                |                                                               |
| 3. vegetables                 | coleslaw, side salad, beetroot, broccoli, butternut squash, cabbage/kale, carrot, cauliflower, celery, courgette, cucumber, garlic, leek, lettuce, mushroom, onion, parsnip, pea, sweet pepper, spinach, sprouts, sweetcorn, sweet potato, fresh tomato, tinned tomato, turnip/swede, watercress, other vegetables                                                                                                          |                                                                |                                                               |
| 4. nuts                       | salted peanuts, unsalted peanuts, salted nuts, unsalted nuts, seeds                                                                                                                                                                                                                                                                                                                                                         |                                                                |                                                               |
| 5. legumes                    | baked bean, pulses, broad bean, green bean, tofu                                                                                                                                                                                                                                                                                                                                                                            |                                                                |                                                               |
| 6. vegetable oils             | Oil-based salad dressing, vegetable oil used for cooking                                                                                                                                                                                                                                                                                                                                                                    |                                                                |                                                               |
| 7. tea & coffee               | instant coffee, filtered coffee, cappuccino, latte, espresso, other coffee type, decaffeinated coffee, standard tea, rooibos tea, green tea, herbal tea, other tea                                                                                                                                                                                                                                                          |                                                                |                                                               |
| 8. fruit juices               | squash, orange juice, grapefruit juice, pure fruit/vegetable juice                                                                                                                                                                                                                                                                                                                                                          |                                                                |                                                               |
| 9. refined grains             | sliced bread, baguette, bap, bread roll, naan bread, garlic bread, crispbread, oatcakes, other bread, white pasta, white rice, other grain, pancake, scotch pancake, danish pastry, scone, cereal bar, savoury biscuits, cheesy biscuits                                                                                                                                                                                    |                                                                |                                                               |
| 10. potatoes                  | fried potatoes, boiled/baked potatoes, mashed potato, crisp                                                                                                                                                                                                                                                                                                                                                                 |                                                                |                                                               |
| 11. sugar sweetened beverages | fizzy drink, fruit smoothie, dairy smoothie, other drink                                                                                                                                                                                                                                                                                                                                                                    |                                                                |                                                               |
| 12. sweets and desserts       | hot chocolate, prune, dried fruit, snackpot, double crust pastry, single crust pastry, crumble, milk-based pudding, fruitcake, cake, doughnut, sponge pudding, cheesecake, other dessert, chocolate bar, white chocolate, milk chocolate, dark chocolate, chocolate-covered raisin, chocolate sweet, diet sweets, sweets, chocolate-covered biscuits, chocolate biscuits, sweet biscuits, other sweets, other savoury snack |                                                                |                                                               |

|                                     |                                                                                                                                                                                                         |                                           |                                            |
|-------------------------------------|---------------------------------------------------------------------------------------------------------------------------------------------------------------------------------------------------------|-------------------------------------------|--------------------------------------------|
| 13.animal fat                       | butter/margarine on bread/crackers, butter/margarine added to potatoes                                                                                                                                  |                                           |                                            |
| 14.dairy                            | milk, flavoured milk, yogurt, ice-cream, low fat hard cheese, hard cheese, soft cheese, blue cheese, low fat cheese spread, cheese spread, cottage cheese, feta, mozzarella, goats cheese, other cheese |                                           |                                            |
| 15.egg                              | whole egg, omelette, eggs in sandwiches, scotch egg, other egg                                                                                                                                          | for each component,                       | for each component,                        |
| 16.fish or seafood                  | tinned tuna, oily fish, breaded fish, battered fish, white fish, prawns, lobster/crab, shellfish, other fish                                                                                            | intakes below the lowest quintile score 5 | intakes above the highest quintile score 1 |
| 17.meat                             | sausage, beef, pork, lamb, crumbed or deep-fried poultry, poultry, bacon, ham, liver, other meat                                                                                                        |                                           |                                            |
| 18.miscellaneous animal-based foods | pizza, chowder or cream soup                                                                                                                                                                            |                                           |                                            |
| total score                         |                                                                                                                                                                                                         | 90                                        | 18                                         |

<sup>a</sup> Each component is divided into quintiles of consumption, and each quintile is assigned a score of 5 to 1.

**Supplementary Table S4. Components and scoring criteria of the healthy Plant-based Diet Index (hPDI).**

| <b>Components</b>            | <b>Food</b>                                                                                                                                                                                                                                                                                                                                                                                                                 | <b>Criteria for maximum score <sup>a</sup></b>                 | <b>Criteria for minimum score</b>                              |
|------------------------------|-----------------------------------------------------------------------------------------------------------------------------------------------------------------------------------------------------------------------------------------------------------------------------------------------------------------------------------------------------------------------------------------------------------------------------|----------------------------------------------------------------|----------------------------------------------------------------|
| 1.whole grains               | porridge, muesli, oat crunch, sweetened cereal, plain cereal, bran cereal, whole-wheat cereal, other cereal, whole-meal pasta, brown rice, couscous                                                                                                                                                                                                                                                                         | for each component, intakes above the highest quintile score 5 | for each component, intakes below the lowest quintile score 1  |
| 2.fruits                     | avocado, stewed fruit, mixed fruit, apple, banana, berry, cherry, grapefruit, grape, mango, melon, orange, satsuma, peach/nectarine, pear, pineapple, plum, other fruit                                                                                                                                                                                                                                                     |                                                                |                                                                |
| 3.vegetables                 | coleslaw, side salad, beetroot, broccoli, butternut squash, cabbage/kale, carrot, cauliflower, celery, courgette, cucumber, garlic, leek, lettuce, mushroom, onion, parsnip, pea, sweet pepper, spinach, sprouts, sweetcorn, sweet potato, fresh tomato, tinned tomato, turnip/swede, watercress, other vegetables                                                                                                          |                                                                |                                                                |
| 4.nuts                       | salted peanuts, unsalted peanuts, salted nuts, unsalted nuts, seeds                                                                                                                                                                                                                                                                                                                                                         |                                                                |                                                                |
| 5.legumes                    | baked bean, pulses, broad bean, green bean, tofu                                                                                                                                                                                                                                                                                                                                                                            |                                                                |                                                                |
| 6.vegetable oils             | Oil-based salad dressing, vegetable oil used for cooking                                                                                                                                                                                                                                                                                                                                                                    |                                                                |                                                                |
| 7.tea & coffee               | instant coffee, filtered coffee, cappuccino, latte, espresso, other coffee type, decaffeinated coffee, standard tea, rooibos tea, green tea, herbal tea, other tea                                                                                                                                                                                                                                                          |                                                                |                                                                |
| 8.fruit juices               | squash, orange juice, grapefruit juice, pure fruit/vegetable juice                                                                                                                                                                                                                                                                                                                                                          | for each component, intakes below the lowest quintile score 5  | for each component, intakes above the highest quintile score 1 |
| 9.refined grains             | sliced bread, baguette, bap, bread roll, naan bread, garlic bread, crispbread, oatcakes, other bread, white pasta, white rice, other grain, pancake, scotch pancake, danish pastry, scone, cereal bar, savoury biscuits, cheesy biscuits                                                                                                                                                                                    |                                                                |                                                                |
| 10.potatoes                  | fried potatoes, boiled/baked potatoes, mashed potato, crisp                                                                                                                                                                                                                                                                                                                                                                 |                                                                |                                                                |
| 11.sugar sweetened beverages | fizzy drink, fruit smoothie, dairy smoothie, other drink                                                                                                                                                                                                                                                                                                                                                                    |                                                                |                                                                |
| 12.sweets and desserts       | hot chocolate, prune, dried fruit, snackpot, double crust pastry, single crust pastry, crumble, milk-based pudding, fruitcake, cake, doughnut, sponge pudding, cheesecake, other dessert, chocolate bar, white chocolate, milk chocolate, dark chocolate, chocolate-covered raisin, chocolate sweet, diet sweets, sweets, chocolate-covered biscuits, chocolate biscuits, sweet biscuits, other sweets, other savoury snack |                                                                |                                                                |

|                                      |                                                                                                                                                                                                         |
|--------------------------------------|---------------------------------------------------------------------------------------------------------------------------------------------------------------------------------------------------------|
| 13. animal fat                       | butter/margarine on bread/crackers, butter/margarine added to potatoes                                                                                                                                  |
| 14. dairy                            | milk, flavoured milk, yogurt, ice-cream, low fat hard cheese, hard cheese, soft cheese, blue cheese, low fat cheese spread, cheese spread, cottage cheese, feta, mozzarella, goats cheese, other cheese |
| 15. egg                              | whole egg, omelette, eggs in sandwiches, scotch egg, other egg                                                                                                                                          |
| 16. fish or seafood                  | tinned tuna, oily fish, breaded fish, battered fish, white fish, prawns, lobster/crab, shellfish, other fish                                                                                            |
| 17. meat                             | sausage, beef, pork, lamb, crumbed or deep-fried poultry, poultry, bacon, ham, liver, other meat                                                                                                        |
| 18. miscellaneous animal-based foods | pizza, chowder or cream soup                                                                                                                                                                            |
| total score                          | 90                                                                                                                                                                                                      |

18

<sup>a</sup> Each component is divided into quintiles of consumption, and each quintile is assigned a score of 5 to 1.



**Supplemental Table S5. Components and scoring criteria of the unhealthy Plant-based Diet Index (uPDI).**

| Components                    | Food                                                                                                                                                                                                                                                                                                                                                                                                                        | Criteria for maximum score <sup>a</sup>                        | Criteria for minimum score                                     |
|-------------------------------|-----------------------------------------------------------------------------------------------------------------------------------------------------------------------------------------------------------------------------------------------------------------------------------------------------------------------------------------------------------------------------------------------------------------------------|----------------------------------------------------------------|----------------------------------------------------------------|
| 1. whole grains               | porridge, muesli, oat crunch, sweetened cereal, plain cereal, bran cereal, whole-wheat cereal, other cereal, whole-meal pasta, brown rice, couscous                                                                                                                                                                                                                                                                         | for each component, intakes below the lowest quintile score 5  | for each component, intakes below the highest quintile score 1 |
| 2. fruits                     | avocado, stewed fruit, mixed fruit, apple, banana, berry, cherry, grapefruit, grape, mango, melon, orange, satsuma, peach/nectarine, pear, pineapple, plum, other fruit                                                                                                                                                                                                                                                     |                                                                |                                                                |
| 3. vegetables                 | coleslaw, side salad, beetroot, broccoli, butternut squash, cabbage/kale, carrot, cauliflower, celery, courgette, cucumber, garlic, leek, lettuce, mushroom, onion, parsnip, pea, sweet pepper, spinach, sprouts, sweetcorn, sweet potato, fresh tomato, tinned tomato, turnip/swede, watercress, other vegetables                                                                                                          |                                                                |                                                                |
| 4. nuts                       | salted peanuts, unsalted peanuts, salted nuts, unsalted nuts, seeds                                                                                                                                                                                                                                                                                                                                                         |                                                                |                                                                |
| 5. legumes                    | baked bean, pulses, broad bean, green bean, tofu                                                                                                                                                                                                                                                                                                                                                                            |                                                                |                                                                |
| 6. vegetable oils             | Oil-based salad dressing, vegetable oil used for cooking                                                                                                                                                                                                                                                                                                                                                                    |                                                                |                                                                |
| 7. tea & coffee               | instant coffee, filtered coffee, cappuccino, latte, espresso, other coffee type, decaffeinated coffee, standard tea, rooibos tea, green tea, herbal tea, other tea                                                                                                                                                                                                                                                          |                                                                |                                                                |
| 8. fruit juices               | squash, orange juice, grapefruit juice, pure fruit/vegetable juice                                                                                                                                                                                                                                                                                                                                                          | for each component, intakes above the highest quintile score 5 | for each component, intakes below the lowest quintile score 1  |
| 9. refined grains             | sliced bread, baguette, bap, bread roll, naan bread, garlic bread, crispbread, oatcakes, other bread, white pasta, white rice, other grain, pancake, scotch pancake, danish pastry, scone, cereal bar, savoury biscuits, cheesy biscuits                                                                                                                                                                                    |                                                                |                                                                |
| 10. potatoes                  | fried potatoes, boiled/baked potatoes, mashed potato, crisp                                                                                                                                                                                                                                                                                                                                                                 |                                                                |                                                                |
| 11. sugar sweetened beverages | fizzy drink, fruit smoothie, dairy smoothie, other drink                                                                                                                                                                                                                                                                                                                                                                    |                                                                |                                                                |
| 12. sweets and desserts       | hot chocolate, prune, dried fruit, snackpot, double crust pastry, single crust pastry, crumble, milk-based pudding, fruitcake, cake, doughnut, sponge pudding, cheesecake, other dessert, chocolate bar, white chocolate, milk chocolate, dark chocolate, chocolate-covered raisin, chocolate sweet, diet sweets, sweets, chocolate-covered biscuits, chocolate biscuits, sweet biscuits, other sweets, other savoury snack |                                                                |                                                                |

|                                      |                                                                                                                                                                                                         |                                           |                                            |
|--------------------------------------|---------------------------------------------------------------------------------------------------------------------------------------------------------------------------------------------------------|-------------------------------------------|--------------------------------------------|
| 13.animal fat                        | butter/margarine on bread/crackers, butter/margarine added to potatoes                                                                                                                                  |                                           |                                            |
| 14.dairy                             | milk, flavoured milk, yogurt, ice-cream, low fat hard cheese, hard cheese, soft cheese, blue cheese, low fat cheese spread, cheese spread, cottage cheese, feta, mozzarella, goats cheese, other cheese |                                           |                                            |
| 15.egg                               | whole egg, omelette, eggs in sandwiches, scotch egg, other egg                                                                                                                                          | for each component,                       | for each component,                        |
| 16.fish or seafood                   | tinned tuna, oily fish, breaded fish, battered fish, white fish, prawns, lobster/crab, shellfish, other fish                                                                                            | intakes below the lowest quintile score 5 | intakes below the highest quintile score 1 |
| 17.meat                              | sausage, beef, pork, lamb, crumbed or deep-fried poultry, poultry, bacon, ham, liver, other meat                                                                                                        |                                           |                                            |
| 18. miscellaneous animal-based foods | pizza, chowder or cream soup                                                                                                                                                                            |                                           |                                            |
| total score                          |                                                                                                                                                                                                         | 90                                        | 18                                         |

<sup>a</sup> Each component is divided into quintiles of consumption, and each quintile is assigned a score of 5 to 1.

**Supplementary Table S6. Components and scoring criteria of the Healthy Eating Index 2015 (HEI-2015).**

| <b>Components</b>            | <b>Food</b>                                                                                                                                                                                                                                                                                                                                                                                                       | <b>Max score<sup>a</sup></b> | <b>Criteria for maximum score</b> | <b>Score of 0</b> |
|------------------------------|-------------------------------------------------------------------------------------------------------------------------------------------------------------------------------------------------------------------------------------------------------------------------------------------------------------------------------------------------------------------------------------------------------------------|------------------------------|-----------------------------------|-------------------|
| 1.total fruits               | stewed fruit, prune, dried fruit, mixed fruit, apple, banana, berry, cherry, grapefruit, grape, mango, melon, orange, satsuma, peach/nectarine, pear, pineapple, plum, other fruit intake                                                                                                                                                                                                                         | 5                            | ≥0.8 cup eq. per 1,000 kcal       | no intake         |
| 2.whole fruits               | fruit juice, stewed fruit, prune, dried fruit, mixed fruit, apple, banana, berry, cherry, grapefruit, grape, mango, melon, orange, satsuma, peach/nectarine, pear, pineapple, plum, other fruit                                                                                                                                                                                                                   | 5                            | ≥0.4 cup eq. per 1,000 kcal       | no intake         |
| 3.total vegetables           | baked bean, pulses, coleslaw, side salad, avocado, broad bean, green bean, beetroot, broccoli, butternut squash, cabbage/kale, carrot, cauliflower, celery, courgette, cucumber, garlic, leek, lettuce, mushroom, onion, parsnip, pea, sweet pepper, spinach, sprouts, sweetcorn, sweet potato, fresh tomato, tinned tomato, turnip/swede, watercress, other vegetables                                           | 5                            | ≥1.1 cup eq. per 1,000 kcal       | no intake         |
| 4.greens and beans           | coleslaw, broccoli, celery, courgette, cucumber, leek, lettuce, spinach, sprouts, watercress, other vegetables, baked bean, pulses, broad bean, green bean, pea                                                                                                                                                                                                                                                   | 5                            | ≥0.2 cup eq. per 1,000 kcal       | no intake         |
| 5.whole grains               | muesli, oat crunch, sweetened cereal, plain cereal, bran cereal, whole-wheat cereal, other cereal, oatcakes, whole-meal pasta, brown rice, couscous                                                                                                                                                                                                                                                               | 10                           | ≥1.5 oz eq. per 1,000 kcal        | no intake         |
| 6.dairy                      | milk, flavoured milk, low fat hard cheese, hard cheese, soft cheese, blue cheese, low fat cheese spread, cheese spread, cottage cheese, feta, mozzarella, goats cheese, other cheese, milk-based pudding, other milk-based pudding, yogurt                                                                                                                                                                        | 10                           | ≥1.3 cup eq. per 1,000 kcal       | no intake         |
| 7.total protein foods        | whole egg, scotch egg, other egg, sausage, beef, pork, lamb, crumbed or deep-fried poultry, poultry, bacon, ham, liver, other meat, tinned tuna, oily fish, breaded fish, battered fish, white fish, prawns, lobster/crab, shellfish, other fish, tofu, quorn, other vegetarian alternative, salted peanuts, unsalted peanuts, salted nuts, unsalted nuts, seeds, baked bean, pulses, broad bean, green bean, pea | 5                            | ≥2.5 oz eq. per 1,000 kcal        | no intake         |
| 8.seafood and plant proteins | tinned tuna, oily fish, breaded fish, battered fish, white fish, prawns, lobster/crab, shellfish, other fish, vegetarian sausages/burgers, tofu, quorn, other vegetarian alternative, salted peanuts, unsalted peanuts, salted nuts, unsalted nuts, seeds, baked bean, pulses, broad bean, green bean, pea                                                                                                        | 5                            | ≥0.8 oz eq. per 1,000 kcal        | no intake         |

|                   |                                                                                                                                                                                                                                                                                                           |    |                                  |                                  |
|-------------------|-----------------------------------------------------------------------------------------------------------------------------------------------------------------------------------------------------------------------------------------------------------------------------------------------------------|----|----------------------------------|----------------------------------|
| 9.fatty acids     | monounsaturated fatty acids, polyunsaturated fatty acids, saturated fatty acids                                                                                                                                                                                                                           | 10 | (MUFA +PUFA) /SFA $\geq$ 2.5     | (MUFA + PUFA)/SFA $\leq$ 1.2     |
| 10.refined grains | porridge, sliced bread, baguette, bap, bread roll, naan bread, garlic bread, crispbread, oatcakes, other bread, white pasta, whole-meal pasta, white rice, sushi, snackpot, other grain, double crust pastry, single crust pastry, crumble, pizza, pancake, scotch pancake, cake, doughnut, other dessert | 10 | $\leq$ 1.8 oz eq. per 1,000 kcal | $\geq$ 4.3 oz eq. per 1,000 kcal |
| 11.sodium         | sodium                                                                                                                                                                                                                                                                                                    | 10 | $\leq$ 1.1 g per 1,000 kcal      | $\geq$ 2.0 g per 1,000 kcal      |
| 12.added sugars   | added sugars and preserves                                                                                                                                                                                                                                                                                | 10 | $\leq$ 6.5% of energy            | $\geq$ 26% of energy             |
| 13.saturated fats | saturated fat                                                                                                                                                                                                                                                                                             | 10 | $\leq$ 8% of energy              | $\geq$ 16% of energy             |
| total score       |                                                                                                                                                                                                                                                                                                           |    | 100                              | 0                                |

Abbreviations: MUFA, monounsaturated fatty acid; PUFA, polyunsaturated fatty acid; SFA, saturated fatty acid; eq., equivalents.

<sup>a</sup> Intakes between maximum score standard and zero points are scored proportionally.

**Supplementary Table S7. Components and scoring criteria of EAT-Lancet Score.**

| <b>Components</b>                | <b>Food</b>                                                                                                                                                                                                                                                | <b>Score for 1 point</b>                   |
|----------------------------------|------------------------------------------------------------------------------------------------------------------------------------------------------------------------------------------------------------------------------------------------------------|--------------------------------------------|
| 1. whole grains                  | muesli, oat crunch, sweetened cereal, plain cereal, bran cereal, whole-wheat cereal, other cereal, sliced bread, baguette, bap, bread roll, naan bread, garlic bread, crispbread, oatcakes, other bread, cereal bar                                        | ≤ 464 g/day                                |
| 2. vegetables                    | vegetable pieces, coleslaw, side salad, avocado, beetroot, broccoli, butternut squash, cabbage/kale, carrot, cauliflower, celery, courgette, cucumber, garlic, leek, lettuce, mushroom, other vegetables                                                   | ≥ 200 g/day                                |
| 3. fruits                        | squash, orange juice, grapefruit juice, pure fruit/vegetable juice, fruit smoothie, stewed fruit, prune, dried fruit, mixed fruit, apple, banana, berry, cherry, grapefruit, other fruit                                                                   | ≥ 100 g/day                                |
| 4. tubers and starchy vegetables | fried potatoes, boiled/baked potatoes, mashed potato, crisp                                                                                                                                                                                                | ≤ 100 g/day                                |
| 5. dry beans, lentils, peas      | baked bean, pulses, broad bean, green bean, pea                                                                                                                                                                                                            | ≤ 100g/day                                 |
| 6. soy foods                     | vegetarian sausages/burgers, tofu                                                                                                                                                                                                                          | ≤ 50g/day                                  |
| 7. peanuts or tree nuts          | salted peanuts, unsalted peanuts, salted nuts, unsalted nuts, seeds                                                                                                                                                                                        | ≥ 25g/day                                  |
| 8. dairy foods                   | low fat hard cheese, hard cheese, soft cheese, blue cheese, low fat cheese spread, cheese spread, cottage cheese, feta, mozzarella, goats cheese, other cheese, milk-based pudding, other milk-based pudding, dairy smoothie, milk, flavoured milk, yogurt | ≤ 500g/day                                 |
| 9. added sugar                   | sugar added to coffee, sugar added to tea, sugar added to cereal                                                                                                                                                                                           | ≤ 31g/day                                  |
| 10. beef, lamb, pork             | beef, lamb, pork, bacon, ham                                                                                                                                                                                                                               | ≤ 28g/day                                  |
| 11. poultry                      | crumbed or deep-fried poultry, poultry                                                                                                                                                                                                                     | ≤ 58g/day                                  |
| 12. eggs                         | whole egg, omelette, eggs in sandwiches, scotch egg, other egg                                                                                                                                                                                             | ≤ 25g/day                                  |
| 13. fish                         | tinned tuna, oily fish, breaded fish, battered fish, white fish, prawns, lobster/crab, shellfish, other fish                                                                                                                                               | ≤ 100g/day                                 |
| 14. added fats                   | monounsaturated fatty acids, polyunsaturated fatty acids, saturated fat                                                                                                                                                                                    | ≥ 0.8 for unsaturated: saturated fat ratio |
| total score                      |                                                                                                                                                                                                                                                            | 14                                         |

**Supplementary Table S8. Single-nucleotide polymorphisms used to construct the genetic risk score for cholelithiasis**

| <b>ID</b>  | <b>Chr</b> | <b>Position</b> | <b>Effect allele</b> | <b>Other allele</b> | <b>P value</b> | <b>EAF</b> | <b>Effect weight</b> |
|------------|------------|-----------------|----------------------|---------------------|----------------|------------|----------------------|
| rs62140201 | 2          | 42214198        | A                    | G                   | 2.97E-06       | 0.017823   | 0.138004             |
| rs77273414 | 2          | 44062784        | A                    | G                   | 3.61E-08       | 0.017216   | -0.17926             |
| rs4401454  | 4          | 95741658        | G                    | A                   | 8.52E-08       | 0.194986   | 0.053809             |
| rs35093039 | 5          | 24061216        | A                    | G                   | 2.54E-06       | 0.166293   | 0.050292             |
| rs78488360 | 7          | 52968812        | T                    | C                   | 2.2E-06        | 0.020549   | -0.13876             |
| rs10832491 | 11         | 15652089        | A                    | C                   | 2.44E-06       | 0.077328   | -0.07244             |
| rs11020842 | 11         | 94317202        | A                    | G                   | 3.65E-06       | 0.03732    | 0.097566             |
| rs4765873  | 12         | 2109251         | T                    | C                   | 2.4E-06        | 0.091698   | 0.064969             |
| rs41276914 | 15         | 90347338        | C                    | T                   | 6.88E-07       | 0.074388   | -0.07726             |
| rs4468717  | 18         | 3457606         | T                    | C                   | 2.61E-06       | 0.138178   | -0.056               |
| rs516246   | 19         | 49206172        | C                    | T                   | 1.51E-08       | 0.625012   | -0.04653             |
| rs2618566  | 20         | 17844684        | G                    | T                   | 1.84E-08       | 0.32278    | -0.04881             |
| rs1800961  | 20         | 43042364        | T                    | C                   | 6.74E-68       | 0.045473   | 0.313022             |

**Supplementary Table S9. Baseline characteristics of participants, according to the quartiles of MED.**

| <b>Characteristics</b>                             | <b>Q1</b>     | <b>Q2</b>      | <b>Q3</b>      | <b>Q4</b>      | <b>Overall</b> |
|----------------------------------------------------|---------------|----------------|----------------|----------------|----------------|
|                                                    | (N=13,970)    | (N=28,365)     | (N=37,987)     | (N=75,001)     | (N=155,323)    |
| <b>Mean (SD) Age, years</b>                        | 56.5 (7.92)   | 56.2 (7.90)    | 56.3 (7.89)    | 56.5 (7.72)    | 56.4 (7.81)    |
| <b>Gender, N (%)</b>                               |               |                |                |                |                |
| Female                                             | 6,029 (43.20) | 14,018 (49.40) | 20,026 (52.70) | 42,754 (57.00) | 82,827 (53.30) |
| Male                                               | 7,941 (56.80) | 14,347 (50.60) | 17,961 (47.30) | 32,247 (43.00) | 72,496 (46.70) |
| <b>Mean (SD) Index of multiple deprivation</b>     | 15.20 (12.40) | 15.30 (12.40)  | 14.90 (12.10)  | 14.50 (11.70)  | 14.80 (12.00)  |
| <b>Education level, N (%)</b>                      |               |                |                |                |                |
| A levels/AS levels or equivalent                   | 1,801 (12.90) | 3,589 (12.70)  | 5,085 (13.40)  | 10,100 (13.50) | 20,575 (13.20) |
| College or University degree                       | 4,967 (35.60) | 10,147 (35.80) | 14,809 (39.00) | 34,328 (45.80) | 64,251 (41.40) |
| CSEs or equivalent                                 | 738 (5.30)    | 1,549 (5.50)   | 1,807 (4.80)   | 2,600 (3.50)   | 6,694 (4.30)   |
| NVQ or HND or HNC or equivalent                    | 921 (6.60)    | 1,793 (6.30)   | 2,205 (5.80)   | 3,783 (5.00)   | 8,702 (5.60)   |
| O levels/GCSEs or equivalent                       | 3,284 (23.50) | 6,681 (23.60)  | 8,509 (22.40)  | 14,891 (19.90) | 33,365 (21.50) |
| <b>Health rate, N (%)</b>                          |               |                |                |                |                |
| Excellent                                          | 2,440 (17.50) | 5,047 (17.80)  | 7,219 (19.00)  | 16,572 (22.10) | 31,278 (20.10) |
| Good                                               | 8,352 (59.80) | 16,971 (59.80) | 22,691 (59.70) | 45,121 (60.20) | 93,135 (60.00) |
| Poor                                               | 466 (3.30)    | 982 (3.50)     | 1,190 (3.10)   | 1,808 (2.40)   | 4,446 (2.90)   |
| <b>Long-standing illness, N (%)</b>                | 4,138 (29.60) | 8,393 (29.60)  | 11,238 (29.60) | 21,098 (28.10) | 44,867 (28.90) |
| <b>Multivitamin use, N (%)</b>                     | 1,824 (13.10) | 3,838 (13.50)  | 5,346 (14.10)  | 11,836 (15.80) | 22,844 (14.70) |
| <b>Intake of mineral supplements, N (%)</b>        | 2,862 (20.50) | 5,806 (20.50)  | 8,110 (21.30)  | 17,359 (23.10) | 34,137 (22.00) |
| <b>Mean (SD) body mass index, kg/m<sup>2</sup></b> | 27.30 (4.42)  | 27.20 (4.57)   | 27.10 (4.60)   | 26.50 (4.53)   | 26.90 (4.56)   |
| <b>Smoking status, N (%)</b>                       |               |                |                |                |                |
| Current                                            | 1,405 (10.10) | 2,640 (9.30)   | 3,047 (8.00)   | 4,482 (6.00)   | 11,574 (7.50)  |
| Never                                              | 7,586 (54.30) | 15,741 (55.50) | 21,462 (56.50) | 43,325 (57.80) | 88,114 (56.70) |
| Previous                                           | 4,937 (35.30) | 9,913 (34.90)  | 13,398 (35.30) | 27,070 (36.10) | 55,318 (35.60) |
| <b>Alcohol consumption, N (%)</b>                  |               |                |                |                |                |
| Daily or almost daily                              | 3,387 (24.20) | 6,812 (24.00)  | 9,184 (24.20)  | 18,154 (24.20) | 37,537 (24.20) |

|                                 |               |               |                |                |                |
|---------------------------------|---------------|---------------|----------------|----------------|----------------|
| Never                           | 690 (4.90)    | 1,494 (5.30)  | 1,931 (5.10)   | 4,054 (5.40)   | 8,169 (5.30)   |
| Once or twice a week            | 3,650 (26.10) | 7,219 (25.50) | 9,622 (25.30)  | 18,517 (24.70) | 39,008 (25.10) |
| One to three times a month      | 1,484 (10.60) | 3,086 (10.90) | 40,66 (10.70)  | 7,771 (10.40)  | 16,407 (10.60) |
| Special occasions only          | 1,154 (8.30)  | 2,597 (9.20)  | 3,372 (8.90)   | 6,431 (8.60)   | 13,554 (8.70)  |
| Three or four times a week      | 3,602 (25.80) | 7,147 (25.20) | 9,799 (25.80)  | 20,056 (26.70) | 40,604 (26.10) |
| <b>Physical activity, N (%)</b> |               |               |                |                |                |
| high                            | 4,293 (30.70) | 8,674 (30.60) | 11,999 (31.60) | 26,158 (34.90) | 51,124 (32.90) |
| low                             | 2,352 (16.80) | 4,641 (16.40) | 5,810 (15.30)  | 10,159 (13.50) | 22,962 (14.80) |
| moderate                        | 4,733 (33.90) | 9,703 (34.20) | 13,309 (35.00) | 26,667 (35.60) | 54,412 (35.00) |

Abbreviations: A levels/AS levels, advanced levels/advanced subsidiary levels; O levels/GCSE, ordinary levels/general certificate of secondary education; CSE, certificate of secondary education; NVQ, national vocational qualification; HND, higher national diploma; HNC, higher national certificate.



**Supplementary Table S10. Baseline characteristics of participants, according to the quartiles of aMED.**

| <b>Characteristics</b>                             | <b>Q1</b>      | <b>Q2</b>      | <b>Q3</b>      | <b>Q4</b>      | <b>Overall</b> |
|----------------------------------------------------|----------------|----------------|----------------|----------------|----------------|
|                                                    | (N=35,413)     | (N=35,662)     | (N=35,430)     | (N=48,818)     | (N=155,323)    |
| <b>Mean (SD) Age, years</b>                        | 56.10 (7.92)   | 56.20 (7.90)   | 56.60 (7.78)   | 56.60 (7.69)   | 56.40 (7.81)   |
| <b>Gender, N (%)</b>                               |                |                |                |                |                |
| Female                                             | 17,527 (49.50) | 18,425 (51.70) | 18,942 (53.50) | 27,933 (57.20) | 82,827 (53.30) |
| Male                                               | 17,886 (50.5)  | 17,237 (48.30) | 16,488 (46.50) | 20,885 (42.80) | 72,496 (46.70) |
| <b>Mean (SD) Index of multiple deprivation</b>     | 15.70 (12.70)  | 15.20 (12.30)  | 14.50 (11.70)  | 14.00 (11.30)  | 14.80 (12.00)  |
| <b>Education level, N (%)</b>                      |                |                |                |                |                |
| A levels/AS levels or equivalent                   | 4,531 (12.80)  | 4,708 (13.20)  | 4,807 (13.60)  | 6,529 (13.40)  | 20,575 (13.20) |
| College or University degree                       | 11,853 (33.50) | 13,445 (37.70) | 14,995 (42.30) | 23,958 (49.10) | 64,251 (41.40) |
| CSEs or equivalent                                 | 2,057 (5.80)   | 1,771 (5.00)   | 1,434 (4.00)   | 1,432 (2.90)   | 6,694 (4.30)   |
| NVQ or HND or HNC or equivalent                    | 2,306 (6.50)   | 2,138 (6.00)   | 1,937 (5.50)   | 2,321 (4.80)   | 8,702 (5.60)   |
| O levels/GCSEs or equivalent                       | 8,558 (24.20)  | 8,247 (23.10)  | 7,450 (21.00)  | 9,110 (18.70)  | 33,365 (21.50) |
| <b>Health rate, N (%)</b>                          |                |                |                |                |                |
| Excellent                                          | 5,938 (16.80)  | 6,635 (18.60)  | 7,289 (20.60)  | 11,416 (23.40) | 31,278 (20.10) |
| Good                                               | 20,920 (59.10) | 21,359 (59.90) | 21,442 (60.50) | 29,414 (60.30) | 93,135 (60.00) |
| Poor                                               | 1,356 (3.80)   | 1,189 (3.30)   | 882 (2.50)     | 1,019 (2.10)   | 4,446 (2.90)   |
| <b>Long-standing illness, N (%)</b>                | 10,770 (30.40) | 10,508 (29.50) | 10,137 (28.60) | 13,452 (27.60) | 4,4867 (28.90) |
| <b>Multivitamin use, N (%)</b>                     | 4,671 (13.20)  | 4,994 (14.00)  | 5,228 (14.80)  | 7,951 (16.30)  | 22,844 (14.70) |
| <b>Intake of mineral supplements, N (%)</b>        | 7,120 (20.10)  | 7,533 (21.10)  | 7,889 (22.30)  | 11,595 (23.80) | 34,137 (22.00) |
| <b>Mean (SD) body mass index, kg/m<sup>2</sup></b> | 27.40 (4.66)   | 27.10 (4.57)   | 26.80 (4.51)   | 26.30 (4.44)   | 26.90(4.56)    |
| <b>Smoking status, N (%)</b>                       |                |                |                |                |                |
| Current                                            | 3,784 (10.70)  | 2,993 (8.40)   | 2,430 (6.90)   | 2,367 (4.80)   | 11,574 (7.50)  |
| Never                                              | 18,908 (53.40) | 19,831 (55.60) | 20,318 (57.30) | 29,057 (59.50) | 88,114 (56.70) |
| Previous                                           | 12,624 (35.60) | 12,767 (35.80) | 12,620 (35.60) | 17,307 (35.50) | 55,318 (35.60) |
| <b>Alcohol consumption, N (%)</b>                  |                |                |                |                |                |
| Daily or almost daily                              | 8,788 (24.80)  | 8,907 (25.00)  | 8,902 (25.10)  | 10,940 (22.40) | 37,537 (24.20) |
| Never                                              | 2,105 (5.90)   | 1,933 (5.40)   | 1,877 (5.30)   | 22,54 (4.60)   | 8,169 (5.30)   |

|                                 |                |                |                |                |                |
|---------------------------------|----------------|----------------|----------------|----------------|----------------|
| Once or twice a week            | 8,711 (24.60)  | 8,711 (24.40)  | 8,733 (24.60)  | 12,853 (26.30) | 39,008 (25.10) |
| One to three times a month      | 3,818 (10.80)  | 3,902 (10.90)  | 3,704 (10.50)  | 4,983 (10.20)  | 16,407 (10.60) |
| Special occasions only          | 3,468 (9.80)   | 3,246 (9.10)   | 3,037 (8.60)   | 3,803 (7.80)   | 13,554 (8.70)  |
| Three or four times a week      | 8,506 (24.00)  | 8,954 (25.10)  | 9,169 (25.90)  | 13,975 (28.60) | 40,604 (26.10) |
| <b>Physical activity, N (%)</b> |                |                |                |                |                |
| high                            | 10,770 (30.40) | 11,377 (31.90) | 11,574 (32.70) | 17,403 (35.60) | 51,124 (32.90) |
| low                             | 5,839 (16.50)  | 5,546 (15.60)  | 5,171 (14.60)  | 6,406 (13.10)  | 22,962 (14.80) |
| moderate                        | 11,891 (33.60) | 12,258 (34.40) | 12,665 (35.70) | 17,598 (36.00) | 54,412 (35.00) |

Abbreviations: A levels/AS levels, advanced levels/advanced subsidiary levels; O levels/GCSE, ordinary levels/general certificate of secondary education; CSE, certificate of secondary education; NVQ, national vocational qualification; HND, higher national diploma; HNC, higher national certificate.

**Supplementary Table S11. Baseline characteristics of participants, according to the quartiles of PDI.**

| <b>Characteristics</b>                             | <b>Q1</b>      | <b>Q2</b>      | <b>Q3</b>      | <b>Q4</b>      | <b>Overall</b> |
|----------------------------------------------------|----------------|----------------|----------------|----------------|----------------|
|                                                    | (N=36,741)     | (N=33,623)     | (N=40,759)     | (N=44,200)     | (N=155,323)    |
| <b>Mean (SD) Age, years</b>                        | 56.20 (7.90)   | 56.30 (7.87)   | 56.50 (7.80)   | 56.50 (7.71)   | 56.40 (7.81)   |
| <b>Gender, N (%)</b>                               |                |                |                |                |                |
| Female                                             | 18,307 (49.80) | 17,374 (51.70) | 21,885 (53.70) | 25,261 (57.20) | 82,827 (53.30) |
| Male                                               | 18,434 (50.20) | 16,249 (48.30) | 18,874 (46.30) | 18,939 (42.80) | 72,496 (46.70) |
| <b>Mean (SD) Index of multiple deprivation</b>     | 15.80 (12.70)  | 15.00 (12.20)  | 14.50 (11.60)  | 14.10 (11.40)  | 14.80 (12.00)  |
| <b>Education level, N (%)</b>                      |                |                |                |                |                |
| A levels/AS levels or equivalent                   | 4,687 (12.80)  | 4,485 (13.30)  | 5,414 (13.30)  | 5,989 (13.50)  | 20,575 (13.20) |
| College or University degree                       | 12,493 (34.00) | 12,937 (38.50) | 17,439 (42.80) | 21,382 (48.40) | 64,251 (41.40) |
| CSEs or equivalent                                 | 2,147 (5.80)   | 1,631 (4.90)   | 1,576 (3.90)   | 1,340 (3.00)   | 6,694 (4.30)   |
| NVQ or HND or HNC or equivalent                    | 2,382 (6.50)   | 2,008 (6.00)   | 2,189 (5.40)   | 2,123 (4.80)   | 8,702 (5.60)   |
| O levels/GCSEs or equivalent                       | 8,784 (23.90)  | 7,591 (22.60)  | 8,668 (21.30)  | 8,322 (18.80)  | 33,365 (21.50) |
| <b>Health rate, N (%)</b>                          |                |                |                |                |                |
| Excellent                                          | 6,164 (16.80)  | 6,484 (19.30)  | 8,306 (20.40)  | 10,324 (23.40) | 31,278 (20.10) |
| Good                                               | 21,902 (59.60) | 20,042 (59.60) | 24,655 (60.50) | 26,536 (60.00) | 93,135 (60.00) |
| Poor                                               | 1,328 (3.60)   | 1,045 (3.10)   | 1,053 (2.60)   | 1,020 (2.30)   | 4,446 (2.90)   |
| <b>Long-standing illness, N (%)</b>                | 10,953 (29.80) | 9,756 (29.00)  | 11,792 (28.90) | 12,366 (28.00) | 4,4867 (28.90) |
| <b>Multivitamin use, N (%)</b>                     | 4,882 (13.30)  | 4,862 (14.50)  | 6,015 (14.80)  | 7,085 (16.00)  | 22,844 (14.70) |
| <b>Intake of mineral supplements, N (%)</b>        | 7,482 (20.40)  | 7,130 (21.20)  | 8,977 (22.00)  | 10,548 (23.90) | 34,137 (22.00) |
| <b>Mean (SD) body mass index, kg/m<sup>2</sup></b> | 27.50 (4.74)   | 27.00 (4.55)   | 26.80 (4.48)   | 26.30 (4.40)   | 26.90 (4.56)   |
| <b>Smoking status, N (%)</b>                       |                |                |                |                |                |
| Current                                            | 3,758 (10.20)  | 2,761 (8.20)   | 2,741 (6.70)   | 2,314 (5.20)   | 11,574 (7.50)  |
| Never                                              | 19,380 (52.70) | 18,841 (56.00) | 23,474 (57.60) | 26,419 (59.80) | 88,114 (56.70) |
| Previous                                           | 13,504 (36.80) | 11,944 (35.50) | 14,467 (35.50) | 15,403 (34.80) | 55,318 (35.60) |
| <b>Alcohol consumption, N (%)</b>                  |                |                |                |                |                |
| Daily or almost daily                              | 9,791 (26.60)  | 8,274 (24.60)  | 9,606 (23.60)  | 9,866 (22.30)  | 37,537 (24.20) |
| Never                                              | 1,703 (4.60)   | 1,759 (5.20)   | 2,186 (5.40)   | 2,521 (5.70)   | 8,169 (5.30)   |

|                                 |                |                |                |                |                |
|---------------------------------|----------------|----------------|----------------|----------------|----------------|
| Once or twice a week            | 9,099 (24.80)  | 8,449 (25.10)  | 10,287 (25.20) | 11,173 (25.30) | 39,008 (25.10) |
| One to three times a month      | 3,716 (10.10)  | 3,530 (10.50)  | 4,346 (10.70)  | 4,815 (10.90)  | 16,407 (10.60) |
| Special occasions only          | 3,091 (8.40)   | 2,920 (8.70)   | 3,597 (8.80)   | 3,946 (8.90)   | 13,554 (8.70)  |
| Three or four times a week      | 9,326 (25.40)  | 8,677 (25.80)  | 10,730 (26.30) | 11,871 (26.90) | 40,604 (26.10) |
| <b>Physical activity, N (%)</b> |                |                |                |                |                |
| high                            | 11,280 (30.70) | 10,694 (31.80) | 13,483 (33.10) | 15,667 (35.40) | 51,124 (32.90) |
| low                             | 6,105 (16.60)  | 5,100 (15.20)  | 6,005 (14.70)  | 57,52 (13.00)  | 22,962 (14.80) |
| moderate                        | 12,289 (33.40) | 11,781 (35.00) | 14,412 (35.40) | 15,930 (36.00) | 54,412 (35.00) |

Abbreviations: A levels/AS levels, advanced levels/advanced subsidiary levels; O levels/GCSE, ordinary levels/general certificate of secondary education; CSE, certificate of secondary education; NVQ, national vocational qualification; HND, higher national diploma; HNC, higher national certificate.

**Supplementary Table S12. Baseline characteristics of participants, according to the quartiles of hPDI.**

| <b>Characteristics</b>                             | <b>Q1</b>      | <b>Q2</b>      | <b>Q3</b>      | <b>Q4</b>      | <b>Overall</b> |
|----------------------------------------------------|----------------|----------------|----------------|----------------|----------------|
|                                                    | (N=33,034)     | (N=39,501)     | (N=42,980)     | (N=39,808)     | (N=155,323)    |
| <b>Mean (SD) Age, years</b>                        | 55.40 (8.02)   | 56.30 (7.81)   | 56.60 (7.79)   | 57.00 (7.59)   | 56.40 (7.81)   |
| <b>Gender, N (%)</b>                               |                |                |                |                |                |
| Female                                             | 14,585 (44.20) | 19,957 (50.50) | 23,631 (55.00) | 24,654 (61.90) | 82,827 (53.30) |
| Male                                               | 18,449 (55.80) | 19,544 (49.50) | 19,349 (45.00) | 15,154 (38.10) | 72,496 (46.70) |
| <b>Mean (SD) Index of multiple deprivation</b>     | 15.30 (12.30)  | 14.80 (12.00)  | 14.80 (12.00)  | 14.50 (11.70)  | 14.80 (12.00)  |
| <b>Education level, N (%)</b>                      |                |                |                |                |                |
| A levels/AS levels or equivalent                   | 4,618 (14.00)  | 5,208 (13.20)  | 5,735 (13.30)  | 5,014 (12.60)  | 20,575 (13.20) |
| College or University degree                       | 13,597 (41.20) | 15,901 (40.30) | 17,491 (40.70) | 17,262 (43.40) | 64,251 (41.40) |
| CSEs or equivalent                                 | 1,534 (4.60)   | 1,812 (4.60)   | 1,852 (4.30)   | 1,496 (3.80)   | 6,694 (4.30)   |
| NVQ or HND or HNC or equivalent                    | 1,926 (5.80)   | 2,324 (5.90)   | 2,388 (5.60)   | 2,064 (5.20)   | 8,702 (5.60)   |
| O levels/GCSEs or equivalent                       | 7,237 (21.90)  | 8,632 (21.90)  | 9,320 (21.70)  | 8,176 (20.50)  | 33,365 (21.50) |
| <b>Health rate, N (%)</b>                          |                |                |                |                |                |
| Excellent                                          | 6,104 (18.50)  | 7,809 (19.80)  | 8,568 (19.90)  | 8,797 (22.10)  | 31,278 (20.10) |
| Good                                               | 19,426 (58.80) | 23,642 (59.90) | 26,059 (60.60) | 24,008 (60.30) | 93,135 (60.00) |
| Poor                                               | 1,140 (3.50)   | 1,178 (3.00)   | 1,188 (2.80)   | 940 (2.40)     | 4,446 (2.90)   |
| <b>Long-standing illness, N (%)</b>                | 10,244 (31.00) | 11,455 (29.00) | 12,189 (28.40) | 10,979 (27.60) | 44,867 (28.90) |
| <b>Multivitamin use, N (%)</b>                     | 4,412 (13.40)  | 5,606 (14.20)  | 6,259 (14.60)  | 6,567 (16.50)  | 2,2844 (14.70) |
| <b>Intake of mineral supplements, N (%)</b>        | 6,789 (20.60)  | 8,366 (21.20)  | 9,424 (21.90)  | 9,558 (24.00)  | 34,137 (22.00) |
| <b>Mean (SD) body mass index, kg/m<sup>2</sup></b> | 27.60 (4.85)   | 27.10 (4.610)  | 26.70 (4.40)   | 26.20 (4.30)   | 26.90 (4.56)   |
| <b>Smoking status, N (%)</b>                       |                |                |                |                |                |
| Current                                            | 2,568 (7.80)   | 3,098 (7.80)   | 3,264 (7.60)   | 2,644 (6.60)   | 11,574 (7.50)  |
| Never                                              | 19,065 (57.70) | 22,401 (56.70) | 24,161 (56.20) | 22,487 (56.50) | 88,114 (56.70) |
| Previous                                           | 11,337 (34.30) | 13,930 (35.30) | 15,464 (36.00) | 14,587 (36.60) | 55,318 (35.60) |
| <b>Alcohol consumption, N (%)</b>                  |                |                |                |                |                |
| Daily or almost daily                              | 7,902 (23.90)  | 9,511 (24.10)  | 10,524 (24.50) | 9,600 (24.10)  | 37,537 (24.20) |
| Never                                              | 1,820 (5.50)   | 2,055 (5.20)   | 2,171 (5.10)   | 2,123 (5.30)   | 8,169 (5.30)   |

|                                 |                |                |                |                |                |
|---------------------------------|----------------|----------------|----------------|----------------|----------------|
| Once or twice a week            | 8,292 (25.10)  | 10,129 (25.60) | 10,797 (25.10) | 97,90 (24.60)  | 39,008 (25.10) |
| One to three times a month      | 3,689 (11.20)  | 4,203 (10.60)  | 4,456 (10.40)  | 4,059 (10.20)  | 16,407 (10.60) |
| Special occasions only          | 2,938 (8.90)   | 3,367 (8.50)   | 3,621 (8.40)   | 3,628 (9.10)   | 13,554 (8.70)  |
| Three or four times a week      | 8,383 (25.40)  | 10,225 (25.90) | 11,397 (26.50) | 10,599 (26.60) | 40,604 (26.10) |
| <b>Physical activity, N (%)</b> |                |                |                |                |                |
| high                            | 10,039 (30.40) | 12,461 (31.50) | 1,4291 (33.30) | 14,333 (36.00) | 51,124 (32.90) |
| low                             | 5,778 (17.50)  | 6,079 (15.40)  | 6,236 (14.50)  | 4,869 (12.20)  | 22,962 (14.80) |
| moderate                        | 11,868 (35.90) | 14,000 (35.40) | 14,884 (34.60) | 13,660 (34.30) | 54,412 (35.00) |

Abbreviations: A levels/AS levels, advanced levels/advanced subsidiary levels; O levels/GCSE, ordinary levels/general certificate of secondary education; CSE, certificate of secondary education; NVQ, national vocational qualification; HND, higher national diploma; HNC, higher national certificate.

**Supplementary Table S13. Baseline characteristics of participants, according to the quartiles of uPDI.**

| <b>Characteristics</b>                             | <b>Q1</b>      | <b>Q2</b>      | <b>Q3</b>      | <b>Q4</b>      | <b>Overall</b> |
|----------------------------------------------------|----------------|----------------|----------------|----------------|----------------|
|                                                    | (N=32,766)     | (N=40,917)     | (N=41,961)     | (N=39,679)     | (N=155,323)    |
| <b>Mean (SD) Age, years</b>                        | 57.00 (7.56)   | 56.70 (7.76)   | 56.40 (7.82)   | 55.50 (8.00)   | 56.40 (7.81)   |
| <b>Gender, N (%)</b>                               |                |                |                |                |                |
| Female                                             | 20,570 (62.80) | 22,867 (55.90) | 21,520 (51.30) | 17,870 (45.00) | 82,827 (53.30) |
| Male                                               | 12,196 (37.20) | 18,050 (44.10) | 20,441 (48.70) | 21,809 (55.00) | 72,496 (46.70) |
| <b>Mean (SD) Index of multiple deprivation</b>     | 14.50 (11.60)  | 14.70 (11.90)  | 14.70 (12.00)  | 15.20 (12.30)  | 14.80 (12.00)  |
| <b>Education level, N (%)</b>                      |                |                |                |                |                |
| A levels/AS levels or equivalent                   | 4,113 (12.60)  | 5,422 (13.30)  | 5,513 (13.10)  | 5,527 (13.90)  | 20,575 (13.20) |
| College or University degree                       | 14,331 (43.70) | 16,747 (40.90) | 16,870 (40.20) | 16,303 (41.10) | 64,251 (41.40) |
| CSEs or equivalent                                 | 1,234 (3.80)   | 1,716 (4.20)   | 1,915 (4.60)   | 1,829 (4.60)   | 6,694 (4.30)   |
| NVQ or HND or HNC or equivalent                    | 1,664 (5.10)   | 2,298 (5.60)   | 2,473 (5.90)   | 2,267 (5.70)   | 8,702 (5.60)   |
| O levels/GCSEs or equivalent                       | 6,670 (20.40)  | 8,831 (21.60)  | 9,153 (21.80)  | 8,711 (22.00)  | 33,365 (21.50) |
| <b>Health rate, N (%)</b>                          |                |                |                |                |                |
| Excellent                                          | 7,313 (22.30)  | 8,306 (20.30)  | 8,232 (19.60)  | 7,427 (18.70)  | 31,278 (20.10) |
| Good                                               | 19,808 (60.50) | 24,778 (60.60) | 25,177 (60.00) | 23,372 (58.90) | 93,135 (60.00) |
| Poor                                               | 749 (2.30)     | 1,102 (2.70)   | 1,253 (3.00)   | 1,342 (3.40)   | 4,446 (2.90)   |
| <b>Long-standing illness, N (%)</b>                | 8,956 (27.30)  | 11,553 (28.20) | 12,156 (29.00) | 12,202 (30.80) | 44,867 (28.90) |
| <b>Multivitamin use, N (%)</b>                     | 5,498 (16.80)  | 6,047 (14.80)  | 5,984 (14.30)  | 5,315 (13.40)  | 22,844 (14.70) |
| <b>Intake of mineral supplements, N (%)</b>        | 7,972 (24.30)  | 9,041 (22.10)  | 8,956 (21.30)  | 8,168 (20.60)  | 34,137 (22.00) |
| <b>Mean (SD) body mass index, kg/m<sup>2</sup></b> | 26.20 (4.29)   | 26.60 (4.37)   | 27.00 (4.59)   | 27.50 (4.82)   | 26.90 (4.56)   |
| <b>Smoking status, N (%)</b>                       |                |                |                |                |                |
| Current                                            | 2,152 (6.60)   | 3,063 (7.50)   | 3,251 (7.70)   | 3,108 (7.80)   | 11,574 (7.50)  |
| Never                                              | 18,485 (56.40) | 23,086 (56.40) | 23,674 (56.40) | 22,869 (57.60) | 88,114 (56.70) |
| Previous                                           | 12,059 (36.80) | 14,683 (35.90) | 14,949 (35.60) | 13,627 (34.30) | 55,318 (35.60) |
| <b>Alcohol consumption, N (%)</b>                  |                |                |                |                |                |
| Daily or almost daily                              | 7,857 (24.00)  | 10,048 (24.60) | 10,156 (24.20) | 9,476 (23.90)  | 37,537 (24.20) |
| Never                                              | 1,756 (5.40)   | 2,068 (5.10)   | 2,180 (5.20)   | 2,165 (5.50)   | 8,169 (5.30)   |

|                                 |                |                |                |                |                |
|---------------------------------|----------------|----------------|----------------|----------------|----------------|
| Once or twice a week            | 8,004 (24.40)  | 10,259 (25.10) | 10,692 (25.50) | 10,053 (25.30) | 39,008 (25.10) |
| One to three times a month      | 3,341 (10.20)  | 4,181 (10.20)  | 4,501 (10.70)  | 4,384 (11.00)  | 16,407 (10.60) |
| Special occasions only          | 3,023 (9.20)   | 3,464 (8.50)   | 3,592 (8.60)   | 3,475 (8.80)   | 13,554 (8.70)  |
| Three or four times a week      | 8,778 (26.80)  | 10,883 (26.60) | 10,828 (25.80) | 10,115 (25.50) | 40,604 (26.10) |
| <b>Physical activity, N (%)</b> |                |                |                |                |                |
| high                            | 11,938 (36.40) | 13,661 (33.40) | 13,415 (32.00) | 12,110 (30.50) | 51,124 (32.90) |
| low                             | 3,914 (11.90)  | 5,831 (14.30)  | 6,403 (15.30)  | 6,814 (17.20)  | 22,962 (14.80) |
| moderate                        | 11,216 (34.20) | 14,180 (34.70) | 14,774 (35.20) | 14,242 (35.90) | 54,412 (35.00) |

Abbreviations: A levels/AS levels, advanced levels/advanced subsidiary levels; O levels/GCSE, ordinary levels/general certificate of secondary education; CSE, certificate of secondary education; NVQ, national vocational qualification; HND, higher national diploma; HNC, higher national certificate.



**Supplementary Table S14. Baseline characteristics of participants, according to the quartiles of HEI-2015.**

| <b>Characteristics</b>                             | <b>Q1</b>      | <b>Q2</b>      | <b>Q3</b>      | <b>Q4</b>      | <b>Overall</b> |
|----------------------------------------------------|----------------|----------------|----------------|----------------|----------------|
|                                                    | (N=38,831)     | (N=38,830)     | (N=38,831)     | (N=38,831)     | (N=155,323)    |
| <b>Mean (SD) Age, years</b>                        | 55.60 (8.08)   | 56.20 (7.92)   | 56.60 (7.69)   | 57.10 (7.47)   | 56.40 (7.81)   |
| <b>Gender, N (%)</b>                               |                |                |                |                |                |
| Female                                             | 17,536 (45.20) | 19,690 (50.70) | 21,231 (54.70) | 24,370 (62.80) | 82,827 (53.30) |
| Male                                               | 21,295 (54.80) | 19,140 (49.30) | 17,600 (45.30) | 14,461 (37.20) | 72,496 (46.70) |
| <b>Mean (SD) Index of multiple deprivation</b>     | 15.90 (12.80)  | 14.80 (12.00)  | 14.30 (11.70)  | 14.10 (11.20)  | 14.80 (12.00)  |
| <b>Education level, N (%)</b>                      |                |                |                |                |                |
| A levels/AS levels or equivalent                   | 4,933 (12.70)  | 5,208 (13.40)  | 5,152 (13.30)  | 5,282 (13.60)  | 20,575 (13.20) |
| College or University degree                       | 13,658 (35.20) | 15,704 (40.40) | 17,004 (43.80) | 17,885 (46.10) | 64,251 (41.40) |
| CSEs or equivalent                                 | 2,216 (5.70)   | 1,773 (4.60)   | 1,518 (3.90)   | 1,187 (3.10)   | 6,694 (4.30)   |
| NVQ or HND or HNC or equivalent                    | 2,540 (6.50)   | 2,168 (5.60)   | 2,115 (5.40)   | 1,879 (4.80)   | 8,702 (5.60)   |
| O levels/GCSEs or equivalent                       | 9,073 (23.40)  | 8,415 (21.70)  | 8,044 (20.70)  | 7,833 (20.20)  | 33,365 (21.50) |
| <b>Health rate, N (%)</b>                          |                |                |                |                |                |
| Excellent                                          | 6,659 (17.10)  | 7,529 (19.40)  | 8,124 (20.90)  | 8,966 (23.10)  | 31,278 (20.10) |
| Good                                               | 22,811 (58.70) | 23,450 (60.40) | 23,469 (60.40) | 23,405 (60.30) | 93,135 (60.00) |
| Poor                                               | 1,500 (3.90)   | 1,130 (2.90)   | 970 (2.50)     | 846 (2.20)     | 4,446 (2.90)   |
| <b>Long-standing illness, N (%)</b>                | 11,687 (30.10) | 11,179 (28.80) | 11,160 (28.70) | 10,841 (27.90) | 44,867 (28.90) |
| <b>Multivitamin use, N (%)</b>                     | 5,007 (12.90)  | 5,443 (14.00)  | 5,780 (14.90)  | 6,614 (17.00)  | 22,844 (14.70) |
| <b>Intake of mineral supplements, N (%)</b>        | 7,770 (20.00)  | 8,265 (21.30)  | 8,706 (22.40)  | 9,396 (24.20)  | 34,137 (22.00) |
| <b>Mean (SD) body mass index, kg/m<sup>2</sup></b> | 27.20 (4.60)   | 27.00 (4.56)   | 26.80 (4.53)   | 26.50 (4.50)   | 26.90 (4.56)   |
| <b>Smoking status, N (%)</b>                       |                |                |                |                |                |
| Current                                            | 4,257 (11.00)  | 2,958 (7.60)   | 2,439 (6.30)   | 1,920 (4.90)   | 11,574 (7.50)  |
| Never                                              | 20,906 (53.80) | 22,066 (56.80) | 22,471 (57.90) | 22,671 (58.40) | 88,114 (56.70) |
| Previous                                           | 13,558 (34.90) | 13,735 (35.40) | 13,854 (35.70) | 14,171 (36.50) | 55,318 (35.60) |
| <b>Alcohol consumption, N (%)</b>                  |                |                |                |                |                |
| Daily or almost daily                              | 9,178 (23.60)  | 9,611 (24.80)  | 9,660 (24.90)  | 9,088 (23.40)  | 37,537 (24.20) |
| Never                                              | 2,179 (5.60)   | 2,058 (5.30)   | 1,871 (4.80)   | 2,061 (5.30)   | 8,169 (5.30)   |

|                                 |                |                |                |                |                |
|---------------------------------|----------------|----------------|----------------|----------------|----------------|
| Once or twice a week            | 9,915 (25.50)  | 9,716 (25.00)  | 9,669 (24.90)  | 9,708 (25.00)  | 39,008 (25.10) |
| One to three times a month      | 4,269 (11.00)  | 4,032 (10.40)  | 4,065 (10.50)  | 4,041 (10.40)  | 16,407 (10.60) |
| Special occasions only          | 3,687 (9.50)   | 3,197 (8.20)   | 3,219 (8.30)   | 3,451 (8.90)   | 13,554 (8.70)  |
| Three or four times a week      | 9,584 (24.70)  | 10,211 (26.30) | 10,337 (26.60) | 10,472 (27.00) | 40,604 (26.10) |
| <b>Physical activity, N (%)</b> |                |                |                |                |                |
| high                            | 12,051 (31.00) | 12,513 (32.20) | 12,789 (32.90) | 13,771 (35.50) | 51,124 (32.90) |
| low                             | 6,250 (16.10)  | 5,926 (15.30)  | 5,765 (14.80)  | 5,021 (12.90)  | 22,962 (14.80) |
| moderate                        | 13,140 (33.80) | 13,580 (35.00) | 13,859 (35.70) | 13,833 (35.6)  | 54,412 (35.00) |

Abbreviations: A levels/AS levels, advanced levels/advanced subsidiary levels; O levels/GCSE, ordinary levels/general certificate of secondary education; CSE, certificate of secondary education; NVQ, national vocational qualification; HND, higher national diploma; HNC, higher national certificate.

**Supplementary Table S15. Baseline characteristics of participants, according to the quartiles of EAT-lancet score.**

| <b>Characteristics</b>                             | <b>Q1</b>      | <b>Q2</b>      | <b>Q3</b>      | <b>Q4</b>      | <b>Overall</b> |
|----------------------------------------------------|----------------|----------------|----------------|----------------|----------------|
|                                                    | (N=27,548)     | (N=36,456)     | (N=43,184)     | (N=48,135)     | (N=155,323)    |
| <b>Mean (SD) Age, years</b>                        | 57.00 (7.69)   | 56.60 (7.79)   | 56.30 (7.85)   | 55.90 (7.85)   | 56.40 (7.81)   |
| <b>Gender, N (%)</b>                               |                |                |                |                |                |
| Female                                             | 12,594 (45.70) | 18,426 (50.50) | 23,327 (54.00) | 28,480 (59.20) | 82,827 (53.30) |
| Male                                               | 14,954 (54.30) | 18,030 (49.50) | 19,857 (46.00) | 19,655 (40.80) | 72,496 (46.70) |
| <b>Mean (SD) Index of multiple deprivation</b>     | 15.10 (12.20)  | 14.80 (12.00)  | 14.80 (12.00)  | 14.60 (11.80)  | 14.80 (12.00)  |
| <b>Education level, N (%)</b>                      |                |                |                |                |                |
| A levels/AS levels or equivalent                   | 3,771 (13.70)  | 4,885 (13.40)  | 5,615 (13.00)  | 6,304 (13.10)  | 20,575 (13.20) |
| College or University degree                       | 10,969 (39.80) | 14,457 (39.70) | 17,460 (40.40) | 21,365 (44.40) | 64,251 (41.40) |
| CSEs or equivalent                                 | 1,166 (4.20)   | 1,614 (4.40)   | 1,909 (4.40)   | 2,005 (4.20)   | 6,694 (4.30)   |
| NVQ or HND or HNC or equivalent                    | 1,744 (6.30)   | 2,136 (5.90)   | 2,464 (5.70)   | 2,358 (4.90)   | 8,702 (5.60)   |
| O levels/GCSEs or equivalent                       | 5,966 (21.70)  | 8,094 (22.20)  | 9,473 (21.90)  | 9,832 (20.40)  | 33,365 (21.50) |
| <b>Health rate, N (%)</b>                          |                |                |                |                |                |
| Excellent                                          | 5,203 (18.90)  | 7,109 (19.50)  | 8,770 (20.30)  | 10,196 (21.20) | 31,278 (20.10) |
| Good                                               | 16,377 (59.40) | 21,834 (59.90) | 25,920 (60.00) | 29,004 (60.30) | 93,135 (60.00) |
| Poor                                               | 879 (3.20)     | 1,130 (3.10)   | 1,242 (2.90)   | 1,195 (2.50)   | 4,446 (2.90)   |
| <b>Long-standing illness, N (%)</b>                | 8,587 (31.20)  | 10,652 (29.20) | 12,297 (28.50) | 13,331 (27.70) | 44,867 (28.90) |
| <b>Multivitamin use, N (%)</b>                     | 3,759 (13.60)  | 5,143 (14.10)  | 6,250 (14.50)  | 7,692 (16.00)  | 22,844 (14.70) |
| <b>Intake of mineral supplements, N (%)</b>        | 5,518 (20.00)  | 7,559 (20.70)  | 9,431 (21.80)  | 11,629 (24.20) | 34,137 (22.00) |
| <b>Mean (SD) body mass index, kg/m<sup>2</sup></b> | 27.40 (4.71)   | 27.10 (4.57)   | 26.90 (4.56)   | 26.40(4.40)    | 26.90 (4.56)   |
| <b>Smoking status, N (%)</b>                       |                |                |                |                |                |
| Current                                            | 2,396 (8.70)   | 2,848 (7.80)   | 3,236 (7.50)   | 3,094 (6.40)   | 11,574 (7.50)  |
| Never                                              | 15,144 (55.00) | 20,543 (56.40) | 24,564 (56.90) | 27,863 (57.90) | 88,114 (56.70) |
| Previous                                           | 9,964 (36.20)  | 12,990 (35.60) | 15,277 (35.40) | 17,087 (35.50) | 55,318 (35.60) |
| <b>Alcohol consumption, N (%)</b>                  |                |                |                |                |                |
| Daily or almost daily                              | 6,942 (25.20)  | 8,939 (24.50)  | 10,495 (24.30) | 11,161 (23.20) | 37,537 (24.20) |
| Never                                              | 1,418 (5.10)   | 1,853 (5.10)   | 2,233 (5.20)   | 2,665 (5.50)   | 8,169 (5.30)   |

|                                 |               |                |                |                |                |
|---------------------------------|---------------|----------------|----------------|----------------|----------------|
| Once or twice a week            | 6,777 (24.60) | 9,196 (25.20)  | 10,938 (25.30) | 12,097 (25.10) | 39,008 (25.10) |
| One to three times a month      | 2,919 (10.60) | 3,817 (10.50)  | 4,513 (10.50)  | 5,158 (10.70)  | 16,407 (10.60) |
| Special occasions only          | 2,394 (8.70)  | 3,153 (8.60)   | 3,758 (8.70)   | 4,249 (8.80)   | 13,554 (8.70)  |
| Three or four times a week      | 7,091 (25.70) | 9,487 (26.00)  | 11,234 (26.00) | 12,792 (26.60) | 40,604 (26.10) |
| <b>Physical activity, N (%)</b> |               |                |                |                |                |
| high                            | 8,580 (31.10) | 11,585 (31.80) | 14,114 (32.70) | 16,845 (35.00) | 51,124 (32.90) |
| low                             | 4,519 (16.40) | 5,726 (15.70)  | 6,369 (14.70)  | 6,348 (13.20)  | 22,962 (14.80) |
| moderate                        | 9,843 (35.70) | 12,790 (35.10) | 15,043 (34.80) | 16,736 (34.80) | 54,412 (35.00) |

Abbreviations: A levels/AS levels, advanced levels/advanced subsidiary levels; O levels/GCSE, ordinary levels/general certificate of secondary education; CSE, certificate of secondary education; NVQ, national vocational qualification; HND, higher national diploma; HNC, higher national certificate.

**Supplementary Table S16. Subgroup analysis for the association between MED and risk of cholelithiasis incidence.**

| Subgroups                    | HR (95% CI) |                  |                  |                  | <i>P</i> for interaction |
|------------------------------|-------------|------------------|------------------|------------------|--------------------------|
|                              | Q1          | Q2               | Q3               | Q4               |                          |
| <b>Age</b>                   |             |                  |                  |                  |                          |
| <60 years                    | 1.00 (ref)  | 1.05 (0.90-1.23) | 1.08 (0.93-1.26) | 0.96 (0.83-1.11) | 0.426                    |
| ≥60 years                    | 1.00 (ref)  | 1.10 (0.94-1.29) | 1.00 (0.86-1.17) | 1.02 (0.88-1.18) |                          |
| <b>Gender</b>                |             |                  |                  |                  |                          |
| Female                       | 1.00 (ref)  | 1.08 (0.92-1.25) | 0.98 (0.85-1.14) | 0.99 (0.86-1.14) | 0.258                    |
| Male                         | 1.00 (ref)  | 1.06 (0.90-1.26) | 1.13 (0.96-1.33) | 0.98 (0.84-1.14) |                          |
| <b>Education level</b>       |             |                  |                  |                  |                          |
| College or University degree | 1.00 (ref)  | 1.07 (0.85-1.33) | 1.14 (0.93-1.41) | 1.02 (0.83-1.24) | 0.479                    |
| Other                        | 1.00 (ref)  | 1.07 (0.94-1.22) | 0.99 (0.88-1.13) | 0.97 (0.86-1.09) |                          |
| <b>Body mass index</b>       |             |                  |                  |                  |                          |
| <25 kg/m <sup>2</sup>        | 1.00 (ref)  | 1.48 (1.12-1.94) | 1.41 (1.08-1.84) | 1.06 (0.82-1.37) | 0.017                    |
| ≥25 kg/m <sup>2</sup>        | 1.00 (ref)  | 1.00 (0.89-1.14) | 0.98 (0.87-1.11) | 0.99 (0.89-1.11) |                          |
| <b>Drinker</b>               |             |                  |                  |                  |                          |
| No                           | 1.00 (ref)  | 1.00 (0.79-1.27) | 0.91 (0.73-1.15) | 0.85 (0.68-1.05) | 0.715                    |
| Yes                          | 1.00 (ref)  | 1.10 (0.97-1.25) | 1.09 (0.96-1.23) | 1.04 (0.92-1.17) |                          |
| <b>Smoking status</b>        |             |                  |                  |                  |                          |
| Never                        | 1.00 (ref)  | 1.02 (0.87-1.19) | 1.03 (0.88-1.19) | 0.95 (0.82-1.09) | 0.657                    |
| Previous                     | 1.00 (ref)  | 1.14 (0.95-1.37) | 1.07 (0.90-1.28) | 1.07 (0.91-1.27) |                          |
| Current                      | 1.00 (ref)  | 1.07 (0.74-1.54) | 1.02 (0.71-1.46) | 0.87 (0.61-1.24) |                          |
| <b>Physical activity</b>     |             |                  |                  |                  |                          |
| Low                          | 1.00 (ref)  | 0.96 (0.81-1.14) | 0.99 (0.84-1.17) | 0.95 (0.81-1.11) | 0.486                    |
| Moderate                     | 1.00 (ref)  | 1.13 (0.92-1.38) | 1.07 (0.88-1.29) | 0.96 (0.80-1.16) |                          |
| High                         | 1.00 (ref)  | 1.20 (0.95-1.50) | 1.08 (0.86-1.34) | 1.08 (0.88-1.33) |                          |

Estimated effects were calculated using Cox model stratified by age, sex, UK Biobank assessment centers, and additionally adjusted for overall health rating, long-standing illness, education, index of multiple deprivation, multivitamin use, mineral use, smoking status, alcohol consumption, physical activity and body mass index.

Supplementary Table S17. Subgroup analysis for the association between aMED and risk of cholelithiasis incidence.

| Subgroups                    | HR (95% CI) |                  |                  |                  | P for interaction |
|------------------------------|-------------|------------------|------------------|------------------|-------------------|
|                              | Q1          | Q2               | Q3               | Q4               |                   |
| <b>Age</b>                   |             |                  |                  |                  |                   |
| <60 years                    | 1.00 (ref)  | 1.05 (0.94-1.17) | 1.02 (0.91-1.14) | 0.89 (0.79-0.99) | 0.779             |
| ≥60 years                    | 1.00 (ref)  | 1.00 (0.89-1.12) | 1.01 (0.90-1.14) | 0.91 (0.82-1.02) |                   |
| <b>Gender</b>                |             |                  |                  |                  |                   |
| Female                       | 1.00 (ref)  | 0.98 (0.88-1.08) | 1.00 (0.90-1.11) | 0.93 (0.84-1.02) | 0.258             |
| Male                         | 1.00 (ref)  | 1.10 (0.97-1.24) | 1.04 (0.92-1.18) | 0.86 (0.76-0.98) |                   |
| <b>Education level</b>       |             |                  |                  |                  |                   |
| College or University degree | 1.00 (ref)  | 1.11 (0.95-1.30) | 1.04 (0.89-1.21) | 0.92 (0.80-1.06) | 0.298             |
| Other                        | 1.00 (ref)  | 0.99 (0.90-1.08) | 1.00 (0.91-1.10) | 0.89 (0.81-0.98) |                   |
| <b>Body mass index</b>       |             |                  |                  |                  |                   |
| <25 kg/m <sup>2</sup>        | 1.00 (ref)  | 1.01 (0.84-1.21) | 0.96 (0.80-1.16) | 0.78 (0.65-0.93) | 0.245             |
| ≥25 kg/m <sup>2</sup>        | 1.00 (ref)  | 1.02 (0.93-1.11) | 1.03 (0.94-1.12) | 0.94 (0.86-1.02) |                   |
| <b>Drinker</b>               |             |                  |                  |                  |                   |
| No                           | 1.00 (ref)  | 0.98 (0.83-1.15) | 1.02 (0.86-1.21) | 0.72 (0.60-0.86) | 0.008             |
| Yes                          | 1.00 (ref)  | 1.04 (0.95-1.14) | 1.01 (0.92-1.11) | 0.96 (0.88-1.05) |                   |
| <b>Smoking status</b>        |             |                  |                  |                  |                   |
| Never                        | 1.00 (ref)  | 1.02 (0.91-1.14) | 1.02 (0.91-1.14) | 0.88 (0.79-0.98) | 0.656             |
| Previous                     | 1.00 (ref)  | 1.05 (0.92-1.19) | 1.04 (0.91-1.19) | 0.97 (0.85-1.10) |                   |
| Current                      | 1.00 (ref)  | 0.95 (0.73-1.24) | 0.86 (0.64-1.16) | 0.80 (0.59-1.10) |                   |
| <b>Physical activity</b>     |             |                  |                  |                  |                   |
| Low                          | 1.00 (ref)  | 1.03 (0.91-1.17) | 1.04 (0.92-1.18) | 0.91 (0.81-1.04) | 0.513             |
| Moderate                     | 1.00 (ref)  | 1.01 (0.87-1.16) | 0.99 (0.86-1.14) | 0.87 (0.76-1.00) |                   |
| High                         | 1.00 (ref)  | 1.01 (0.87-1.19) | 1.00 (0.86-1.18) | 0.91 (0.78-1.05) |                   |

Estimated effects were calculated using Cox model stratified by age, sex, UK Biobank assessment centers, and additionally adjusted for overall health rating, long-standing illness, education, index of multiple deprivation, multivitamin use, mineral use, smoking status, alcohol consumption, physical activity and body mass index.

**Supplementary Table S18. Subgroup analysis for the association between PDI and risk of cholelithiasis incidence.**

| Subgroups                    | HR (95% CI) |                  |                  |                  | <i>P</i> for interaction |
|------------------------------|-------------|------------------|------------------|------------------|--------------------------|
|                              | Q1          | Q2               | Q3               | Q4               |                          |
| <b>Age</b>                   |             |                  |                  |                  |                          |
| <60 years                    | 1.00 (ref)  | 1.01 (0.90-1.14) | 1.01 (0.91-1.13) | 1.00 (0.89-1.11) | 0.049                    |
| ≥60 years                    | 1.00 (ref)  | 1.02 (0.90-1.14) | 0.97 (0.87-1.09) | 1.03 (0.92-1.15) |                          |
| <b>Gender</b>                |             |                  |                  |                  |                          |
| Female                       | 1.00 (ref)  | 1.01 (0.91-1.12) | 1.00 (0.90-1.11) | 1.00 (0.90-1.11) | 0.643                    |
| Male                         | 1.00 (ref)  | 1.02 (0.89-1.15) | 0.97 (0.85-1.10) | 1.03 (0.90-1.16) |                          |
| <b>Education level</b>       |             |                  |                  |                  |                          |
| College or University degree | 1.00 (ref)  | 1.05 (0.89-1.22) | 1.03 (0.89-1.20) | 1.03 (0.89-1.19) | 0.397                    |
| Other                        | 1.00 (ref)  | 1.00 (0.91-1.10) | 0.97 (0.88-1.07) | 1.00 (0.91-1.10) |                          |
| <b>Body mass index</b>       |             |                  |                  |                  |                          |
| <25 kg/m <sup>2</sup>        | 1.00 (ref)  | 1.09 (0.90-1.31) | 1.06 (0.88-1.26) | 0.88 (0.74-1.06) | 0.012                    |
| ≥25 kg/m <sup>2</sup>        | 1.00 (ref)  | 0.98 (0.89-1.07) | 0.95 (0.87-1.04) | 1.03 (0.94-1.12) |                          |
| <b>Drinker</b>               |             |                  |                  |                  |                          |
| No                           | 1.00 (ref)  | 1.14 (0.96-1.36) | 1.09 (0.92-1.29) | 0.97 (0.81-1.16) | 0.852                    |
| Yes                          | 1.00 (ref)  | 0.99 (0.91-1.09) | 0.98 (0.89-1.07) | 1.04 (0.95-1.14) |                          |
| <b>Smoking status</b>        |             |                  |                  |                  |                          |
| Never                        | 1.00 (ref)  | 1.06 (0.95-1.19) | 1.02 (0.92-1.14) | 1.02 (0.91-1.14) | 0.734                    |
| Previous                     | 1.00 (ref)  | 0.98 (0.86-1.12) | 0.99 (0.87-1.12) | 1.01 (0.89-1.14) |                          |
| Current                      | 1.00 (ref)  | 0.84 (0.64-1.12) | 0.78 (0.58-1.05) | 1.06 (0.80-1.41) |                          |
| <b>Physical activity</b>     |             |                  |                  |                  |                          |
| Low                          | 1.00 (ref)  | 1.05 (0.92-1.19) | 1.05 (0.92-1.18) | 1.04 (0.92-1.18) | 0.415                    |
| Moderate                     | 1.00 (ref)  | 1.03 (0.89-1.19) | 0.96 (0.84-1.11) | 1.03 (0.90-1.18) |                          |
| High                         | 1.00 (ref)  | 0.96 (0.81-1.12) | 0.96 (0.82-1.11) | 0.94 (0.81-1.10) |                          |

Estimated effects were calculated using Cox model stratified by age, sex, UK Biobank assessment centers, and additionally adjusted for overall health rating, long-standing illness, education, index of multiple deprivation, multivitamin use, mineral use, smoking status, alcohol consumption, physical activity and body mass index.

**Supplementary Table S19. Subgroup analysis for the association between hPDI and risk of cholelithiasis incidence.**

| Subgroups                    | HR (95% CI) |                  |                  |                  | <i>P</i> for interaction |
|------------------------------|-------------|------------------|------------------|------------------|--------------------------|
|                              | Q1          | Q2               | Q3               | Q4               |                          |
| <b>Age</b>                   |             |                  |                  |                  |                          |
| <60 years                    | 1.00 (ref)  | 1.03 (0.92-1.15) | 1.01 (0.91-1.13) | 0.98 (0.87-1.10) | 0.644                    |
| ≥60 years                    | 1.00 (ref)  | 0.99 (0.88-1.11) | 0.92 (0.81-1.03) | 0.93 (0.83-1.05) |                          |
| <b>Gender</b>                |             |                  |                  |                  |                          |
| Female                       | 1.00 (ref)  | 0.95 (0.85-1.05) | 0.92 (0.83-1.02) | 0.97 (0.87-1.08) | 0.061                    |
| Male                         | 1.00 (ref)  | 1.09 (0.96-1.23) | 1.03 (0.91-1.17) | 0.92 (0.81-1.06) |                          |
| <b>Education level</b>       |             |                  |                  |                  |                          |
| College or University degree | 1.00 (ref)  | 1.07 (0.92-1.23) | 0.98 (0.84-1.13) | 0.98 (0.84-1.14) | 0.942                    |
| Other                        | 1.00 (ref)  | 0.98 (0.89-1.08) | 0.97 (0.88-1.07) | 0.96 (0.87-1.06) |                          |
| <b>Body mass index</b>       |             |                  |                  |                  |                          |
| <25 kg/m <sup>2</sup>        | 1.00 (ref)  | 0.95 (0.79-1.15) | 0.92 (0.77-1.11) | 0.91 (0.75-1.09) | 0.243                    |
| ≥25 kg/m <sup>2</sup>        | 1.00 (ref)  | 0.99 (0.91-1.08) | 0.93 (0.85-1.02) | 0.92 (0.84-1.01) |                          |
| <b>Drinker</b>               |             |                  |                  |                  |                          |
| No                           | 1.00 (ref)  | 0.95 (0.79-1.13) | 1.01 (0.85-1.20) | 1.11 (0.93-1.32) | 0.287                    |
| Yes                          | 1.00 (ref)  | 1.02 (0.93-1.12) | 0.95 (0.87-1.05) | 0.92 (0.83-1.01) |                          |
| <b>Smoking status</b>        |             |                  |                  |                  |                          |
| Never                        | 1.00 (ref)  | 0.96 (0.86-1.08) | 0.94 (0.84-1.05) | 0.95 (0.85-1.07) | 0.821                    |
| Previous                     | 1.00 (ref)  | 1.04 (0.91-1.18) | 1.01 (0.89-1.15) | 0.96 (0.84-1.10) |                          |
| Current                      | 1.00 (ref)  | 1.13 (0.83-1.52) | 0.92 (0.68-1.26) | 1.05 (0.77-1.44) |                          |
| <b>Physical activity</b>     |             |                  |                  |                  |                          |
| Low                          | 1.00 (ref)  | 0.94 (0.83-1.06) | 0.93 (0.82-1.06) | 0.91 (0.80-1.04) | 0.213                    |
| Moderate                     | 1.00 (ref)  | 1.11 (0.96-1.28) | 1.06 (0.92-1.22) | 1.05 (0.90-1.21) |                          |
| High                         | 1.00 (ref)  | 1.00 (0.86-1.18) | 0.93 (0.80-1.10) | 0.94 (0.80-1.10) |                          |

Estimated effects were calculated using Cox model stratified by age, sex, UK Biobank assessment centers, and additionally adjusted for overall health rating, long-standing illness, education, index of multiple deprivation, multivitamin use, mineral use, smoking status, alcohol consumption, physical activity and body mass index.



**Supplementary Table S20. Subgroup analysis for the association between uPDI and risk of cholelithiasis incidence.**

| Subgroups                    | HR (95% CI) |                  |                  |                  | P for interaction |
|------------------------------|-------------|------------------|------------------|------------------|-------------------|
|                              | Q1          | Q2               | Q3               | Q4               |                   |
| <b>Age</b>                   |             |                  |                  |                  |                   |
| <60 years                    | 1.00 (ref)  | 1.12 (0.99-1.27) | 1.04 (0.92-1.18) | 1.09 (0.96-1.23) | 0.249             |
| ≥60 years                    | 1.00 (ref)  | 0.99 (0.88-1.12) | 1.10 (0.98-1.23) | 1.08 (0.96-1.22) |                   |
| <b>Gender</b>                |             |                  |                  |                  |                   |
| Female                       | 1.00 (ref)  | 1.05 (0.95-1.17) | 1.00 (0.90-1.11) | 1.05 (0.94-1.17) | 0.173             |
| Male                         | 1.00 (ref)  | 1.06 (0.92-1.23) | 1.18 (1.03-1.36) | 1.13 (0.98-1.30) |                   |
| <b>Education level</b>       |             |                  |                  |                  |                   |
| College or University degree | 1.00 (ref)  | 1.02 (0.88-1.19) | 1.05 (0.91-1.22) | 1.06 (0.91-1.23) | 0.979             |
| Other                        | 1.00 (ref)  | 1.06 (0.96-1.18) | 1.07 (0.97-1.18) | 1.08 (0.97-1.20) |                   |
| <b>Body mass index</b>       |             |                  |                  |                  |                   |
| <25 kg/m <sup>2</sup>        | 1.00 (ref)  | 1.18 (0.99-1.41) | 1.16 (0.96-1.38) | 1.19 (0.99-1.44) | 0.127             |
| ≥25 kg/m <sup>2</sup>        | 1.00 (ref)  | 1.02 (0.93-1.13) | 1.06 (0.97-1.17) | 1.10 (1.00-1.21) |                   |
| <b>Drinker</b>               |             |                  |                  |                  |                   |
| No                           | 1.00 (ref)  | 0.98 (0.82-1.16) | 0.87 (0.73-1.04) | 0.88 (0.74-1.05) | 0.131             |
| Yes                          | 1.00 (ref)  | 1.08 (0.98-1.20) | 1.13 (1.03-1.25) | 1.15 (1.04-1.26) |                   |
| <b>Smoking status</b>        |             |                  |                  |                  |                   |
| Never                        | 1.00 (ref)  | 0.99 (0.88-1.11) | 1.01 (0.90-1.13) | 1.05 (0.94-1.18) | 0.773             |
| Previous                     | 1.00 (ref)  | 1.15 (1.00-1.31) | 1.13 (0.99-1.30) | 1.11 (0.97-1.27) |                   |
| Current                      | 1.00 (ref)  | 1.00 (0.73-1.38) | 1.07 (0.78-1.46) | 1.03 (0.74-1.42) |                   |
| <b>Physical activity</b>     |             |                  |                  |                  |                   |
| Low                          | 1.00 (ref)  | 1.07 (0.94-1.23) | 1.05 (0.92-1.20) | 1.12 (0.98-1.28) | 0.424             |
| Moderate                     | 1.00 (ref)  | 1.10 (0.95-1.27) | 1.08 (0.94-1.25) | 1.03 (0.89-1.20) |                   |
| High                         | 1.00 (ref)  | 0.99 (0.85-1.16) | 1.07 (0.92-1.25) | 1.07 (0.91-1.25) |                   |

Estimated effects were calculated using Cox model stratified by age, sex, UK Biobank assessment centers, and additionally adjusted for overall health rating, long-standing illness, education, index of multiple deprivation, multivitamin use, mineral use, smoking status, alcohol consumption, physical activity and body mass index.

**Supplementary Table S21. Subgroup analysis for the association between HEI-2015 and risk of cholelithiasis incidence.**

| Subgroups                    | HR (95% CI) |                  |                  |                  | <i>P</i> for interaction |
|------------------------------|-------------|------------------|------------------|------------------|--------------------------|
|                              | Q1          | Q2               | Q3               | Q4               |                          |
| <b>Age</b>                   |             |                  |                  |                  |                          |
| <60 years                    | 1.00 (ref)  | 1.00 (0.90-1.11) | 0.92 (0.83-1.03) | 0.83 (0.74-0.94) | 0.360                    |
| ≥60 years                    | 1.00 (ref)  | 1.08 (0.96-1.21) | 0.98 (0.88-1.10) | 0.95 (0.85-1.07) |                          |
| <b>Gender</b>                |             |                  |                  |                  |                          |
| Female                       | 1.00 (ref)  | 1.05 (0.95-1.16) | 1.03 (0.93-1.15) | 0.93 (0.84-1.03) | 0.173                    |
| Male                         | 1.00 (ref)  | 1.02 (0.91-1.15) | 0.84 (0.74-0.95) | 0.85 (0.74-0.97) |                          |
| <b>Education level</b>       |             |                  |                  |                  |                          |
| College or University degree | 1.00 (ref)  | 1.03 (0.89-1.20) | 0.92 (0.80-1.07) | 0.92 (0.80-1.07) | 0.391                    |
| Other                        | 1.00 (ref)  | 1.03 (0.94-1.12) | 0.96 (0.87-1.05) | 0.86 (0.78-0.95) |                          |
| <b>Body mass index</b>       |             |                  |                  |                  |                          |
| <25 kg/m <sup>2</sup>        | 1.00 (ref)  | 1.03 (0.87-1.23) | 0.89 (0.74-1.06) | 0.83 (0.69-0.99) | 0.045                    |
| ≥25 kg/m <sup>2</sup>        | 1.00 (ref)  | 1.04 (0.96-1.14) | 0.98 (0.89-1.07) | 0.91 (0.83-1.00) |                          |
| <b>Drinker</b>               |             |                  |                  |                  |                          |
| No                           | 1.00 (ref)  | 1.05 (0.89-1.23) | 1.00 (0.84-1.18) | 0.77 (0.65-0.92) | 0.202                    |
| Yes                          | 1.00 (ref)  | 1.02 (0.94-1.12) | 0.94 (0.86-1.03) | 0.93 (0.85-1.02) |                          |
| <b>Smoking status</b>        |             |                  |                  |                  |                          |
| Never                        | 1.00 (ref)  | 1.08 (0.97-1.20) | 0.99 (0.89-1.11) | 0.91 (0.82-1.02) | 0.519                    |
| Previous                     | 1.00 (ref)  | 1.02 (0.90-1.15) | 0.93 (0.82-1.06) | 0.91 (0.80-1.03) |                          |
| Current                      | 1.00 (ref)  | 0.88 (0.68-1.15) | 0.79 (0.59-1.06) | 0.71 (0.50-0.99) |                          |
| <b>Physical activity</b>     |             |                  |                  |                  |                          |
| Low                          | 1.00 (ref)  | 1.01 (0.89-1.13) | 1.00 (0.89-1.13) | 0.89 (0.78-1.01) | 0.797                    |
| Moderate                     | 1.00 (ref)  | 0.99 (0.86-1.13) | 0.88 (0.77-1.01) | 0.86 (0.75-0.99) |                          |
| High                         | 1.00 (ref)  | 1.13 (0.97-1.31) | 0.96 (0.82-1.12) | 0.91 (0.78-1.07) |                          |

Estimated effects were calculated using Cox model stratified by age, sex, UK Biobank assessment centers, and additionally adjusted for overall health rating, long-standing illness, education, index of multiple deprivation, multivitamin use, mineral use, smoking status, alcohol consumption, physical activity and body mass index.

**Supplementary Table S22. Subgroup analysis for the association between EAT-lancet score and risk of cholelithiasis incidence.**

| Subgroups                    | HR (95% CI) |                  |                  |                  | P for interaction |
|------------------------------|-------------|------------------|------------------|------------------|-------------------|
|                              | Q1          | Q2               | Q3               | Q4               |                   |
| <b>Age</b>                   |             |                  |                  |                  |                   |
| <60 years                    | 1.00 (ref)  | 1.02 (0.90-1.16) | 1.09 (0.97-1.23) | 1.04 (0.92-1.17) | 0.090             |
| ≥60 years                    | 1.00 (ref)  | 0.92 (0.82-1.04) | 0.91 (0.81-1.02) | 0.96 (0.86-1.08) |                   |
| <b>Gender</b>                |             |                  |                  |                  |                   |
| Female                       | 1.00 (ref)  | 0.92 (0.82-1.03) | 0.95 (0.85-1.06) | 0.95 (0.85-1.06) | 0.438             |
| Male                         | 1.00 (ref)  | 1.03 (0.90-1.17) | 1.06 (0.93-1.21) | 1.06 (0.93-1.21) |                   |
| <b>Education level</b>       |             |                  |                  |                  |                   |
| College or University degree | 1.00 (ref)  | 0.89 (0.75-1.04) | 1.05 (0.90-1.22) | 1.03 (0.89-1.20) | 0.2256            |
| Other                        | 1.00 (ref)  | 1.00 (0.91-1.11) | 0.98 (0.88-1.08) | 0.98 (0.89-1.09) |                   |
| <b>Body mass index</b>       |             |                  |                  |                  |                   |
| <25 kg/m <sup>2</sup>        | 1.00 (ref)  | 1.04 (0.85-1.27) | 0.96 (0.79-1.17) | 0.98 (0.81-1.19) | 0.406             |
| ≥25 kg/m <sup>2</sup>        | 1.00 (ref)  | 0.94 (0.85-1.03) | 0.99 (0.90-1.08) | 0.97 (0.89-1.07) |                   |
| <b>Drinker</b>               |             |                  |                  |                  |                   |
| No                           | 1.00 (ref)  | 0.93 (0.77-1.12) | 0.97 (0.81-1.16) | 1.05 (0.88-1.25) | 0.279             |
| Yes                          | 1.00 (ref)  | 0.98 (0.89-1.08) | 1.00 (0.91-1.10) | 0.98 (0.89-1.08) |                   |
| <b>Smoking status</b>        |             |                  |                  |                  |                   |
| Never                        | 1.00 (ref)  | 0.95 (0.84-1.07) | 0.97 (0.87-1.09) | 0.95 (0.85-1.07) | 0.859             |
| Previous                     | 1.00 (ref)  | 0.99 (0.86-1.13) | 1.04 (0.91-1.19) | 1.07 (0.94-1.23) |                   |
| Current                      | 1.00 (ref)  | 1.01 (0.74-1.38) | 0.98 (0.72-1.33) | 0.99 (0.73-1.35) |                   |
| <b>Physical activity</b>     |             |                  |                  |                  |                   |
| Low                          | 1.00 (ref)  | 1.04 (0.90-1.19) | 1.08 (0.95-1.24) | 1.01 (0.88-1.16) | 0.198             |
| Moderate                     | 1.00 (ref)  | 0.93 (0.80-1.09) | 1.03 (0.89-1.19) | 1.01 (0.88-1.17) |                   |
| High                         | 1.00 (ref)  | 0.92 (0.78-1.09) | 0.84 (0.72-1.00) | 0.95 (0.82-1.12) |                   |

Estimated effects were calculated using Cox model stratified by age, sex, UK Biobank assessment centers, and additionally adjusted for overall health rating, long-standing illness, education, index of multiple deprivation, multivitamin use, mineral use, smoking status, alcohol consumption, physical activity and body mass index.

**Supplementary Table S23. Sensitivity analyses of the cholelithiasis risk according to MED and the level of genetic risk<sup>a</sup>.**

| Group                            | Sensitivity analysis <sup>b</sup> |         | Sensitivity analysis <sup>c</sup> |         | Sensitivity analysis <sup>d</sup> |         |
|----------------------------------|-----------------------------------|---------|-----------------------------------|---------|-----------------------------------|---------|
|                                  | HR (95%CI)                        | P value | HR (95%CI)                        | P value | HR (95%CI)                        | P value |
| <b>High genetic risk</b>         |                                   |         |                                   |         |                                   |         |
| Quartile 1                       | 1.00 (ref)                        |         | 1.00 (ref)                        |         | 1.00 (ref)                        |         |
| Quartile 4                       | 1.07 (0.85-1.36)                  | 0.564   | 1.06 (0.83-1.34)                  | 0.646   | 1.07 (0.85-1.33)                  | 0.574   |
| <b>Intermediate genetic risk</b> |                                   |         |                                   |         |                                   |         |
| Quartile 1                       | 1.02 (0.79-1.30)                  | 0.899   | 1.00 (0.78-1.29)                  | 0.982   | 0.98 (0.78-1.25)                  | 0.898   |
| Quartile 4                       | 0.94 (0.75-1.18)                  | 0.601   | 0.92 (0.73-1.15)                  | 0.450   | 0.92 (0.75-1.14)                  | 0.470   |
| <b>Low genetic risk</b>          |                                   |         |                                   |         |                                   |         |
| Quartile 1                       | 0.92 (0.67-1.26)                  | 0.597   | 0.90 (0.65-1.23)                  | 0.492   | 0.92 (0.69-1.25)                  | 0.604   |
| Quartile 4                       | 0.90 (0.71-1.15)                  | 0.396   | 0.87 (0.69-1.11)                  | 0.273   | 0.91 (0.73-1.15)                  | 0.442   |

<sup>a</sup> Hazard ratio and 95% CI were estimated from multivariate Cox regression models stratified by age, sex, UK Biobank assessment centers, and additionally adjusted for overall health rating, long-standing illness, education, index of multiple deprivation, multivitamin use, mineral use, smoking status, alcohol consumption, physical activity and body mass index.

<sup>b</sup> Sensitivity analysis lagged the exposure by 2 years.

<sup>c</sup> Sensitivity analysis lagged the exposure by 4 years.

<sup>d</sup> sensitivity analysis removed the variable BMI from the multivariable-adjusted model.

**Supplementary Table S24. Sensitivity analyses of the cholelithiasis risk according to aMED and the level of genetic risk<sup>a</sup>.**

| Group                            | Sensitivity analysis <sup>b</sup> |         | Sensitivity analysis <sup>c</sup> |         | Sensitivity analysis <sup>d</sup> |         |
|----------------------------------|-----------------------------------|---------|-----------------------------------|---------|-----------------------------------|---------|
|                                  | HR (95%CI)                        | P value | HR (95%CI)                        | P value | HR (95%CI)                        | P value |
| <b>High genetic risk</b>         |                                   |         |                                   |         |                                   |         |
| Quartile 1                       | 1.00 (ref)                        |         | 1.00 (ref)                        |         | 1.00 (ref)                        |         |
| Quartile 4                       | 0.96 (0.81-1.13)                  | 0.604   | 0.95 (0.80-1.13)                  | 0.568   | 0.95 (0.81-1.12)                  | 0.538   |
| <b>Intermediate genetic risk</b> |                                   |         |                                   |         |                                   |         |
| Quartile 1                       | 0.93 (0.80-1.07)                  | 0.321   | 0.93 (0.80-1.07)                  | 0.311   | 0.92 (0.80-1.06)                  | 0.269   |
| Quartile 4                       | 0.78 (0.68-0.91)                  | 0.001   | 0.77 (0.67-0.89)                  | 0.001   | 0.76 (0.66-0.88)                  | <0.001  |
| <b>Low genetic risk</b>          |                                   |         |                                   |         |                                   |         |
| Quartile 1                       | 0.75 (0.62-0.91)                  | 0.004   | 0.75 (0.62-0.91)                  | 0.003   | 0.79 (0.66-0.95)                  | 0.012   |
| Quartile 4                       | 0.74 (0.62-0.89)                  | 0.001   | 0.73 (0.61-0.88)                  | 0.001   | 0.74 (0.63-0.88)                  | 0.001   |

<sup>a</sup> Hazard ratio and 95% CI were estimated from multivariate Cox regression models stratified by age, sex, UK Biobank assessment centers, and additionally adjusted for overall health rating, long-standing illness, education, index of multiple deprivation, multivitamin use, mineral use, smoking status, alcohol consumption, physical activity and body mass index.

<sup>b</sup> Sensitivity analysis lagged the exposure by 2 years.

<sup>c</sup> Sensitivity analysis lagged the exposure by 4 years.

<sup>d</sup> sensitivity analysis removed the variable BMI from the multivariable-adjusted model.

**Supplementary Table S25. Sensitivity analyses of the cholelithiasis risk according to PDI and the level of genetic risk<sup>a</sup>.**

| Group                            | Sensitivity analysis <sup>b</sup> |         | Sensitivity analysis <sup>c</sup> |         | Sensitivity analysis <sup>d</sup> |         |
|----------------------------------|-----------------------------------|---------|-----------------------------------|---------|-----------------------------------|---------|
|                                  | HR (95%CI)                        | P value | HR (95%CI)                        | P value | HR (95%CI)                        | P value |
| <b>High genetic risk</b>         |                                   |         |                                   |         |                                   |         |
| Quartile 1                       | 1.00 (ref)                        |         | 1.00 (ref)                        |         | 1.00 (ref)                        |         |
| Quartile 4                       | 0.93 (0.78-1.10)                  | 0.398   | 0.94 (0.78-1.11)                  | 0.452   | 0.86 (0.73-1.02)                  | 0.082   |
| <b>Intermediate genetic risk</b> |                                   |         |                                   |         |                                   |         |
| Quartile 1                       | 0.84 (0.73-0.97)                  | 0.021   | 0.85 (0.73-0.98)                  | 0.028   | 0.82 (0.72-0.94)                  | 0.004   |
| Quartile 4                       | 0.88 (0.76-1.01)                  | 0.068   | 0.88 (0.76-1.01)                  | 0.074   | 0.81 (0.71-0.93)                  | 0.002   |
| <b>Low genetic risk</b>          |                                   |         |                                   |         |                                   |         |
| Quartile 1                       | 0.80(0.67-0.96)                   | 0.016   | 0.80 (0.67-0.97)                  | 0.02    | 0.80 (0.67-0.95)                  | 0.012   |
| Quartile 4                       | 0.82 (0.68-0.98)                  | 0.028   | 0.81 (0.67-0.97)                  | 0.023   | 0.78 (0.66-0.92)                  | 0.004   |

<sup>a</sup> Hazard ratio and 95% CI were estimated from multivariate Cox regression models stratified by age, sex, UK Biobank assessment centers, and additionally adjusted for overall health rating, long-standing illness, education, index of multiple deprivation, multivitamin use, mineral use, smoking status, alcohol consumption, physical activity and body mass index.

<sup>b</sup> Sensitivity analysis lagged the exposure by 2 years.

<sup>c</sup> Sensitivity analysis lagged the exposure by 4 years.

<sup>d</sup> sensitivity analysis removed the variable BMI from the multivariable-adjusted model.

**Supplementary Table S26. Sensitivity analyses of the cholelithiasis risk according to hPDI and the level of genetic risk<sup>a</sup>.**

| Group                            | Sensitivity analysis <sup>b</sup> |         | Sensitivity analysis <sup>c</sup> |         | Sensitivity analysis <sup>d</sup> |         |
|----------------------------------|-----------------------------------|---------|-----------------------------------|---------|-----------------------------------|---------|
|                                  | HR (95%CI)                        | P value | HR (95%CI)                        | P value | HR (95%CI)                        | P value |
| <b>High genetic risk</b>         |                                   |         |                                   |         |                                   |         |
| Quartile 1                       | 1.00 (ref)                        |         | 1.00 (ref)                        |         | 1.00 (ref)                        |         |
| Quartile 4                       | 1.03 (0.86-1.24)                  | 0.713   | 1.03 (0.86-1.24)                  | 0.718   | 0.87 (0.73-1.04)                  | 0.116   |
| <b>Intermediate genetic risk</b> |                                   |         |                                   |         |                                   |         |
| Quartile 1                       | 0.91 (0.78-1.06)                  | 0.224   | 0.91 (0.78-1.07)                  | 0.266   | 0.85 (0.73-0.98)                  | 0.026   |
| Quartile 4                       | 0.88 (0.76-1.03)                  | 0.113   | 0.89 (0.76-1.04)                  | 0.129   | 0.75 (0.65-0.87)                  | <0.001  |
| <b>Low genetic risk</b>          |                                   |         |                                   |         |                                   |         |
| Quartile 1                       | 0.88 (0.72-1.07)                  | 0.190   | 0.87 (0.72-1.07)                  | 0.186   | 0.84 (0.70-1.01)                  | 0.062   |
| Quartile 4                       | 0.81 (0.67-0.99)                  | 0.036   | 0.79 (0.65-0.97)                  | 0.023   | 0.73 (0.61-0.87)                  | 0.001   |

<sup>a</sup> Hazard ratio and 95% CI were estimated from multivariate Cox regression models stratified by age, sex, UK Biobank assessment centers, and additionally adjusted for overall health rating, long-standing illness, education, index of multiple deprivation, multivitamin use, mineral use, smoking status, alcohol consumption, physical activity and body mass index.

<sup>b</sup> Sensitivity analysis lagged the exposure by 2 years.

<sup>c</sup> Sensitivity analysis lagged the exposure by 4 years.

<sup>d</sup> sensitivity analysis removed the variable BMI from the multivariable-adjusted model.

**Supplementary Table S27. Sensitivity analyses of the cholelithiasis risk according to uPDI and the level of genetic risk<sup>a</sup>.**

| Group                            | Sensitivity analysis <sup>b</sup> |         | Sensitivity analysis <sup>c</sup> |         | Sensitivity analysis <sup>d</sup> |         |
|----------------------------------|-----------------------------------|---------|-----------------------------------|---------|-----------------------------------|---------|
|                                  | HR (95%CI)                        | P value | HR (95%CI)                        | P value | HR (95%CI)                        | P value |
| <b>High genetic risk</b>         |                                   |         |                                   |         |                                   |         |
| Quartile 4                       | 1.00 (ref)                        |         | 1.00 (ref)                        |         | 1.00 (ref)                        |         |
| Quartile 1                       | 1.04 (0.87-1.25)                  | 0.650   | 1.03 (0.86-1.25)                  | 0.720   | 0.89 (0.75-1.06)                  | 0.199   |
| <b>Intermediate genetic risk</b> |                                   |         |                                   |         |                                   |         |
| Quartile 4                       | 0.93 (0.80-1.07)                  | 0.292   | 0.93 (0.80-1.07)                  | 0.295   | 0.87 (0.76-1.00)                  | 0.047   |
| Quartile 1                       | 0.86 (0.74-1.00)                  | 0.047   | 0.86 (0.74-1.00)                  | 0.045   | 0.75 (0.65-0.86)                  | <0.001  |
| <b>Low genetic risk</b>          |                                   |         |                                   |         |                                   |         |
| Quartile 4                       | 0.91 (0.76-1.08)                  | 0.274   | 0.90 (0.75-1.08)                  | 0.251   | 0.88 (0.75-1.05)                  | 0.149   |
| Quartile 1                       | 0.79 (0.64-0.96)                  | 0.021   | 0.77 (0.62-0.94)                  | 0.011   | 0.73 (0.60-0.88)                  | 0.001   |

<sup>a</sup> Hazard ratio and 95% CI were estimated from multivariate Cox regression models stratified by age, sex, UK Biobank assessment centers, and additionally adjusted for overall health rating, long-standing illness, education, index of multiple deprivation, multivitamin use, mineral use, smoking status, alcohol consumption, physical activity and body mass index.

<sup>b</sup> Sensitivity analysis lagged the exposure by 2 years.

<sup>c</sup> Sensitivity analysis lagged the exposure by 4 years.

<sup>d</sup> sensitivity analysis removed the variable BMI from the multivariable-adjusted model.



**Supplementary Table S28. Sensitivity analyses of the cholelithiasis risk according to HEI-2015 and the level of genetic risk<sup>a</sup>.**

| Group                            | Sensitivity analysis <sup>b</sup> |         | Sensitivity analysis <sup>c</sup> |         | Sensitivity analysis <sup>d</sup> |         |
|----------------------------------|-----------------------------------|---------|-----------------------------------|---------|-----------------------------------|---------|
|                                  | HR (95%CI)                        | P value | HR (95%CI)                        | P value | HR (95%CI)                        | P value |
| <b>High genetic risk</b>         |                                   |         |                                   |         |                                   |         |
| Quartile 1                       | 1.00 (ref)                        |         | 1.00 (ref)                        |         | 1.00 (ref)                        |         |
| Quartile 4                       | 0.84 (0.70-1.00)                  | 0.051   | 0.84 (0.70-1.00)                  | 0.053   | 0.89 (0.75-1.06)                  | 0.185   |
| <b>Intermediate genetic risk</b> |                                   |         |                                   |         |                                   |         |
| Quartile 1                       | 0.83 (0.72-0.95)                  | 0.008   | 0.82 (0.72-0.95)                  | 0.007   | 0.83 (0.73-0.95)                  | 0.007   |
| Quartile 4                       | 0.73 (0.64-0.85)                  | <0.001  | 0.73 (0.63-0.84)                  | <0.001  | 0.74 (0.65-0.85)                  | <0.001  |
| <b>Low genetic risk</b>          |                                   |         |                                   |         |                                   |         |
| Quartile 1                       | 0.82 (0.69-0.98)                  | 0.025   | 0.81 (0.68-0.97)                  | 0.020   | 0.87 (0.74-1.03)                  | 0.102   |
| Quartile 4                       | 0.70 (0.58-0.85)                  | <0.001  | 0.70 (0.58-0.85)                  | <0.001  | 0.73 (0.61-0.87)                  | 0.001   |

<sup>a</sup> Hazard ratio and 95% CI were estimated from multivariate Cox regression models stratified by age, sex, UK Biobank assessment centers, and additionally adjusted for overall health rating, long-standing illness, education, index of multiple deprivation, multivitamin use, mineral use, smoking status, alcohol consumption, physical activity and body mass index.

<sup>b</sup> Sensitivity analysis lagged the exposure by 2 years.

<sup>c</sup> Sensitivity analysis lagged the exposure by 4 years.

<sup>d</sup> sensitivity analysis removed the variable BMI from the multivariable-adjusted model.

**Supplementary Table S29. Sensitivity analyses of the cholelithiasis risk according to EAT-lancet score and the level of genetic risk<sup>a</sup>.**

| Group                            | Sensitivity analysis <sup>b</sup> |         | Sensitivity analysis <sup>c</sup> |         | Sensitivity analysis <sup>d</sup> |         |
|----------------------------------|-----------------------------------|---------|-----------------------------------|---------|-----------------------------------|---------|
|                                  | HR (95%CI)                        | P value | HR (95%CI)                        | P value | HR (95%CI)                        | P value |
| <b>High genetic risk</b>         |                                   |         |                                   |         |                                   |         |
| Quartile 1                       | 1.00 (ref)                        |         | 1.00 (ref)                        |         | 1.00 (ref)                        |         |
| Quartile 4                       | 1.02 (0.85-1.23)                  | 0.813   | 1.04 (0.86-1.25)                  | 0.723   | 0.94 (0.79-1.13)                  | 0.526   |
| <b>Intermediate genetic risk</b> |                                   |         |                                   |         |                                   |         |
| Quartile 1                       | 0.96 (0.81-1.14)                  | 0.653   | 0.98 (0.82-1.16)                  | 0.794   | 0.93 (0.79-1.09)                  | 0.354   |
| Quartile 4                       | 0.94 (0.79-1.10)                  | 0.434   | 0.93 (0.79-1.10)                  | 0.426   | 0.85 (0.73-1.00)                  | 0.047   |
| <b>Low genetic risk</b>          |                                   |         |                                   |         |                                   |         |
| Quartile 1                       | 0.86 (0.69-1.07)                  | 0.176   | 0.85 (0.68-1.06)                  | 0.148   | 0.84 (0.68-1.03)                  | 0.100   |
| Quartile 4                       | 0.90 (0.74-1.10)                  | 0.312   | 0.89 (0.73-1.09)                  | 0.266   | 0.85 (0.71-1.02)                  | 0.085   |

<sup>a</sup> Hazard ratio and 95% CI were estimated from multivariate Cox regression models stratified by age, sex, UK Biobank assessment centers, and additionally adjusted for overall health rating, long-standing illness, education, index of multiple deprivation, multivitamin use, mineral use, smoking status, alcohol consumption, physical activity and body mass index.

<sup>b</sup> Sensitivity analysis lagged the exposure by 2 years.

<sup>c</sup> Sensitivity analysis lagged the exposure by 4 years.

<sup>d</sup> sensitivity analysis removed the variable BMI from the multivariable-adjusted model.

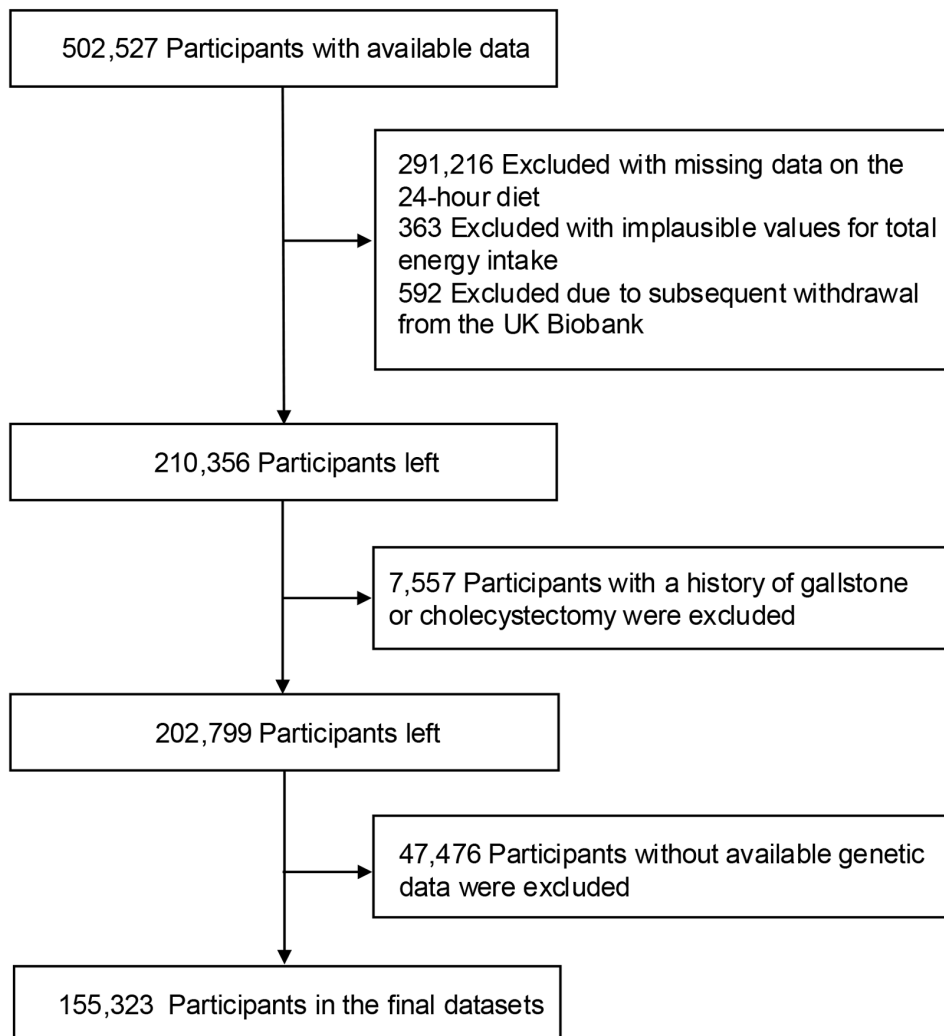

**Supplementary Figure S1. Flow diagram of participants in the present study.**

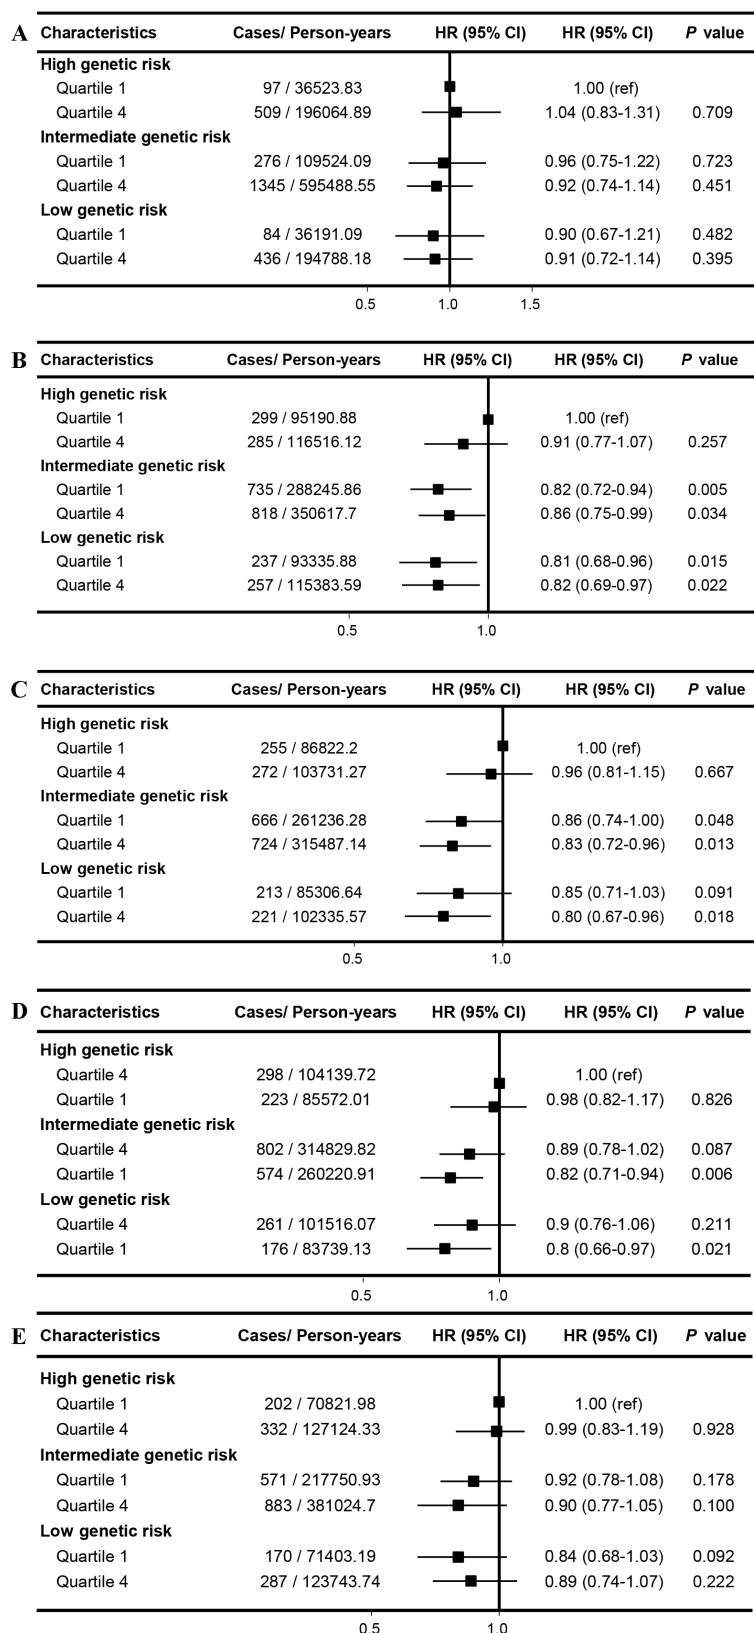

**Supplementary Figure S2. Joint effects and interactions of dietary patterns and PRS on cholelithiasis risk. (A) MED (B) PDI (C) hPDI (D) uPDI (E) EAT-lancet score.**

Estimated effects were calculated using Cox model stratified by age, sex, UK Biobank assessment centers, and additionally adjusted for overall health rating, long-standing illness, education, index of multiple deprivation, multivitamin use, mineral use, smoking status, alcohol consumption, physical activity and body mass index. Abbreviations: ref = reference, HR: Hazard Ratio, CI, CI: Confidence Interval.
